# Supplementary material for: Endogenous G-quadruplex-forming RNAs inhibit the activity of SARS-CoV-2 RNA polymerase
Source: Royal Society of Chemistry journal article supplement (doi:10.1039/d2cc05858h), 2022-12-16
Supplement: d2cc05858h1.pdf [file d2cc05858h1.pdf]

## Endogenous G-quadruplex-forming RNAs inhibit activity of SARS-CoV-2 RNA polymerase

Tamaki Endoh,<sup>a</sup> Shuntaro Takahashi<sup>a</sup> and Naoki Sugimoto<sup>\*b</sup>

<sup>a</sup>Frontier Institute for Biomolecular Engineering Research (FIBER), Konan University, 7-1-20 Minatojima-minamimachi, Kobe, 650-0047, Japan

<sup>b</sup>Graduate School of Frontiers of Innovative Research in Science and Technology (FIRST), Konan University, 7-1-20 Minatojima-minamimachi, Kobe, 650-0047, Japan

\*To whom correspondence should be addressed. Tel: +81-78-303-1416; Fax: +81-78-303-1495; Email: sugimoto@konan-u.ac.jp

### Materials

DNA and RNA oligonucleotides used in this study were purchased from Fasmac Co., Ltd. or Japan Bio Services Co., Ltd. Chemical reagents not specifically mentioned are those appropriate for biochemical experiments.

### Preparation of recombinant proteins

The plasmid vector pRSFDuet-1(nsp8-nsp7)(nsp12) for the expression of RdRp of SARS-CoV-2, which consists of a complex of Nsp7, Nsp8, and Nsp12, was a gift from Marc Delarue (Addgene plasmid #165451; <http://n2t.net/addgene:165451>; RRID: Addgene\_165451).<sup>1</sup> In the construct, the hexahistidine tag was fused to the N-terminus of the Nsp8 subunit. *E. coli* BL21(DE3) was transformed with the expression vector. The cells were cultured in LB medium to an A<sub>600</sub> of around 0.5 and chilled on ice for 15 min. The cell culture was restarted by transfer to 18 °C, followed by addition of isopropyl β-D-1-thiogalactopyranoside. After overnight culture by shaking, the cells were harvested and lysed by sonication. The soluble fraction was loaded sequentially on His-trap HP, Hitrap Q HP, and Hiload Superdex 200 (GE Healthcare). Finally, the solution containing RdRp was passed through a MonoQ column (GE Healthcare) to eliminate residual RNase. The purified RdRp was concentrated using an Amicon Ultra centrifugal filter units (Millipore) and dialyzed against the storage buffer (50 mM Tris-HCl pH 7.5, 50 mM NaCl, 0.1 mM EDTA, 1 mM DTT, and 50%(v/v) glycerol). The purified RdRp was stored at -30°C until use.

### Construction of fragmented cDNA library

Human lung carcinoma A549 cells were cultured on collagen-coated dishes (AGC Techno Glass) in Dulbecco's Modified Eagle Medium with 10% foetal bovine serum and antibiotics (100 U/mL penicillin and 100 µg/mL streptomycin) at 37 °C under 5% CO<sub>2</sub>. Total RNA was purified by using an RNeasy Mini Kit (Qiagen) according to the manufacturer's protocol. Concentration of the purified RNAs was

determined from absorbance at 260 nm measured using a Nano Drop 1000 (Thermo Fisher Scientific). A fragmented cDNA library consisting of sequences derived from the total RNA was prepared from 10 ng total RNA using SMARTer Stranded Total RNA-Seq Kit v2 - Pico Input Mammalian (Takara Bio) according to the manufacturer's protocol. The concentration of the cDNA library was determined from absorbance at 260 nm measured using the Nano Drop 1000. Adapter sequences, A-T7 and trP1, for preparation of R-CAMPs were incorporated by PCR amplification using sense (A-T7-read2) and antisense (trP1-read1) primers (Table S4). Approximately 1.8 ng template cDNA library was amplified in the presence of 30 pmol primers by 7-cycle PCR using KOD-Plus-Ver.2 (Toyobo) in a 100- $\mu$ L reaction volume. The PCR products were purified using a QIAquick PCR Purification Kit (Qiagen) followed by size selection using an E-Gel SizeSelect II Agarose Gel (Thermo Fisher Scientific). Fragments of approximately 300 to 350 base pairs were extracted. Purified DNA fragments were quantified using the Mx3000P qPCR system (Agilent) using A-primer and B-trP1 primer (Table S4) by comparison to known concentrations of a standard DNA fragment.

### **Preparation of RNA-capturing microsphere particles (R-CAMPs)**

Preparation of R-CAMPs from the cDNA library was performed according to the previously established protocol with some modifications.<sup>2</sup> Briefly, the fragmented cDNA library was mixed with the microsphere particles from the Ion PGM Hi-Q View OT2 Kit (Thermo Fisher Scientific). Single copies of DNA derived from the library were amplified and immobilized on the particles through emulsion PCR using the Ion OneTouch 2 system (Thermo Fisher Scientific) according to the manufacturer's protocol. The particles, which immobilize single-stranded clones derived from the fragmented cDNA library, were purified by the Ion OneTouch 2 system. The double-stranded template DNAs for RNA transcription were synthesized on the particles by primer extension using a capture primer shown in Table S4. The reaction product of the primer extension was diluted 15 fold into a transcription buffer containing 40 mM Tris-HCl (pH 8.0), 8 mM MgCl<sub>2</sub>, 5 mM DTT, 2 mM spermidine, 1 mM rNTPs, 0.01% Tween-20, and 1 U/ $\mu$ L T7 RNA polymerase (Takara Bio). During the transcription at 25 °C for 20 min, R-CAMPs were constructed by capturing nascent RNA transcripts on the single-stranded tail remaining on the capture primer.<sup>3</sup> The buffer solution, in which R-CAMPs were dispersed, was replaced with 50 mM MES-LiOH (pH 7.0), 100 mM KCl, 0.5 mM MgCl<sub>2</sub>, and 0.01% Tween-20 after termination of transcription by addition 800 nM competitive T7 promoter duplex consisting of 5'-GAAATTAATACGACTCACTATA-3' and 5'-TATAGTGAGTCGTATTAATTTTC-3'.

### **Selection of R-CAMPs**

R-CAMPs were mixed with 100 nM NTA-ATTO647N (Sigma) in the presence or absence of 10 nM RdRp in a buffer containing 50 mM MES-LiOH (pH 7.0), 100 mM KCl, 0.5 mM MgCl<sub>2</sub>, 100 ng/ $\mu$ L yeast tRNA (Thermo Fisher Scientific), 0.01% Tween 20 and kept at room temperature for at least 30 min. Fluorescence signals of R-CAMPs at 660 nm after excitation with a 633-nm laser were analysed using a FACS Aria II (BD Biosciences). Single particles were distinguished by the fluorescence signal of the

particle itself at 585 nm upon 488-nm excitation. R-CAMPs in a sorting gate with strong fluorescence of NTA-ATTO647N were sorted one-by-one into the wells of a 96-well plate (Ina-optika) containing 10  $\mu$ L of H<sub>2</sub>O.

### **Sequence analysis of sorted RNAs**

DNAs immobilized on R-CAMPs were directly amplified by addition of 10  $\mu$ L of reaction solution of KOD-Plus-Ver.2 containing A-primer and B-trP1 primers. After 20-cycle PCR reactions, aliquots of the samples were diluted 10 fold with H<sub>2</sub>O to make DNA stocks. DNAs in the remaining reaction solutions were further amplified up to 35 cycles, and crude PCR products were sequenced by a contract sequencing service (Fasmac) with an A-primer.

### **Preparation of sorted RNAs**

DNA templates for RNA transcription were prepared from 1  $\mu$ L DNA stocks by 15-cycle PCR amplification using KOD-Plus-Ver.2 with A-primer and B-trP1 primers in 10  $\mu$ L reaction volumes. The PCR products were directly diluted 3 fold into the transcription buffer containing 40 mM Tris-HCl (pH 8.0), 8 mM MgCl<sub>2</sub>, 5 mM DTT, 2 mM spermidine, 1 mM rNTPs, 0.01% Tween-20, and 1 U/ $\mu$ L T7 RNA polymerase. After a 2-h transcription reaction at 37 °C, samples were mixed with 2 U of TURBO DNase (Thermo Fisher Scientific), and further incubated at 37 °C for 30 min. Transcribed RNAs were purified using AMPure XP (Beckman Coulter). Concentrations of the purified RNAs were measured using the Nano Drop 1000. To prepare highly purified RNAs, RNAs were transcribed using ScriptMAX Thermo T7 Transcription Kit (Toyobo) and purified using a denaturing polyacrylamide gel. The RNA concentrations were determined by measuring the absorbance at 260 nm at 90 °C using a UV/Vis spectrophotometer connected to a thermoprogrammer (UV-1700; Shimadzu). To transcribe G10 RNA variants, DNA templates were prepared by primer extension or PCR amplification using oligonucleotides shown in Table S4.

### **Primer extension assay**

Substrate RNA for the reaction was prepared by annealing FAM-labelled 20-nt primer RNA (2  $\mu$ M) and 40-nt template RNA (2  $\mu$ M) (Table S4) by cooling from 95 to 25 °C at 1 °C min<sup>-1</sup> in a buffer containing 50 mM Tris-HCl (pH 7.5), 100 mM KCl, 5 mM MgCl<sub>2</sub>, and 1 mM DTT. RdRp was pre-incubated at 37 °C with sorted RNAs or G10 RNA variants in a buffer containing 50 mM Tris-HCl (pH 7.5), 100 mM KCl, 5 mM MgCl<sub>2</sub>, 1 mM DTT, and 312.5  $\mu$ M rNTPs and subsequently mixed with the annealed substrate RNA. Final concentrations of RdRp, rNTPs, and substrate RNA were 2  $\mu$ M, 250  $\mu$ M, and 200 nM, respectively. Sorted RNAs crudely purified using magnetic beads were added at 250 ng/ $\mu$ L, and RNAs highly purified by denaturing polyacrylamide gel electrophoresis were added at 3  $\mu$ M. Samples were incubated at 37 °C for 60 min. Reactions were stopped by addition 4 volumes of a stop solution containing 10 mM EDTA, 80 vol% formamide, and 0.2 wt% blue dextran (SIGMA). Aliquots of the

samples were then separated on a 20% denaturing polyacrylamide gel containing 8 M urea. After gel electrophoresis, FAM-labelled RNAs were imaged using an FLA5100 fluorescence image scanner (Fuji Film) with 532 nm excitation and 575 nm emission. Signal intensities of initial and extended primers were quantified using ImageQuant TL software (GE Healthcare). Percent of extended primer to total primer were calculated using equation 1.

$$\text{Percent of extended primer} = \frac{I_{EP}}{I_{IP} + I_{EP}} \times 100 \quad (1)$$

where  $I_{IP}$  is signal intensity of initial primer and  $I_{EP}$  is signal intensity of extended primer.

When reaction was performed in the presence of LiCl, RdRp dialysed into a buffer containing LiCl (50 mM Tris-HCl pH 7.5, 50 mM LiCl, 0.1 mM EDTA, 1 mM DTT, and 50%(v/v) glycerol) was used, and reaction buffer contained 100 mM LiCl instead of 100 mM KCl.

### Fluorescence assay of NMM

RNAs (100 nM) were mixed with NMM (1  $\mu$ M) in a buffer containing 50 mM MES-LiOH (pH 7.0), 100 mM KCl, 0.5 mM MgCl<sub>2</sub>, 0.1% DMSO, and 0.01% Tween20. The RNAs were refolded by cooling from 70 to 25 °C at 1 °C min<sup>-1</sup> in the buffer before addition of NMM. Fluorescence signals of NMM were measured using a microwell plate reader (Infinite M200 pro, TECAN) at 400 nm excitation and 615 nm emission wavelengths after incubation at 25 °C for 60 min.

1. C. Madru, A. D. Tekpinar, S. Rosario, D. Czernecki, S. Brûlé, L. Sauguet and M. Delarue, *PLoS One*, 2021, **16**, e0250610.
2. S. Satpathi, T. Endoh, P. Podbevšek, J. Plavec and N. Sugimoto, *Nucleic Acids Res.*, 2021, DOI: 10.1093/nar/gkab189.
3. T. Endoh, T. Ohyama and N. Sugimoto, *Small*, 2019, **15**, 1805062.

Table S1. RNA sequences on selected R-CAMPs

| Sample | Sequence <sup>a</sup>                                                                                                                                                                                                      |
|--------|----------------------------------------------------------------------------------------------------------------------------------------------------------------------------------------------------------------------------|
| A01    | GGGGCGTATCAACCTGCCACAGGAAGCTGCAGGCCCGCTTGACCAGATGAGAAAATTTAGACGCCAGCATGAACAGCTAAGAGCTGTTATCGT<br>CAGGGTCTGAGGCCACAGGTCACGGCAGTTGCACAACAGAATCAAGGAGAGGTCCTGAAACTAA                                                          |
| A02    | GGGGAAGATTATTTAGTCAAGAAAAAAGAAAGACAATCAACAATATGTCAAAAAATTCAGGTCCAATTATAGAGCAAAAATAAATGAGGCATGA<br>TTTTGAGTTATTCATGAAGAATAAAGAGAGGCTTGATAGGTACATTTCTTTTTCTATGGCACAG                                                         |
| A03    | GGCACTGTACAAGGAAGCTTTTCTCTCTCTAATTAGCTTTCCAGTATACTTCTTAGAAAAGTCCAAGTGTTTCAGGACTTTTATACCTGTTATAC<br>TTTGGCTTGGTTTCCATGATTCTTACTTTATTAGCTAGTTTATCACCAATAATACTTA                                                              |
| A04    | GGGTGGAAGAGGATTTGACAGTTATTAATATCAACAGCAGTGATGAAGAGGAGGGAAGGAAGAAGGAAGAAGAAGAGGAAGAAGAGG<br>AAGAGGAGGAAAGACTTTGAGGAAGAGGAAGAGGATGAAGAGGAATATTTTGAAGGGGAAG                                                                   |
| A05    | CGCCCTGAGGGGAGATGCACAAACCCAGGACCCAAAAAATCAGGGGATTTGTGAGCAAATGATTTAACCCAAGACCCCGCAGGGTAGCACACCC<br>AAGTGGGTCTGGTGTGATTCTTACTGCAGCTCTCTACTCCACACCCACGATAAGCCAC                                                               |
| A06    | N. D. <sup>b</sup>                                                                                                                                                                                                         |
| A07    | N. D. <sup>b</sup>                                                                                                                                                                                                         |
| A08    | GGGAGGCACCCGGTCTCGGGGCGAGCAACCGCGGGCCCTTGACAGAACGGGACTGTTTGGGAAGTGTTCCCGCACAGTGTCCGGAGAGGGC<br>CCTCCCTCTGTGCCCCCTTGGGAAACACTGCTTGGTACAATCCAATACCCAGCTGTACCTGCCCCAG                                                         |
| A09    | GGCTGTACAAATGACAATAGCTGTTGGAAGTCCGACCGAAGAACTTCAGCCGTGGCTCTCTAGTCTTGTGTCAATATCCTTTATTGTTTT<br>GATGATTATTTCTCAGCATGGCTCATATTCTACTTCAATCAGAAGTACAGGTACACAAATGCACGCAACGTC                                                     |
| A10    | GGGGCGCATGAGCTGGAGTCTTAGGCACAGCTCTAAGCTCCTTATTTCAGCCGAGCTGGGCCAGCCAGGCAACCTTCTAGGTAACGACCACATCT<br>ACAACGTTATCGTACAGCCCATGATTTGTAATAATCTTCTCATAGTAATAC                                                                     |
| A11    | GGGGGAAGAAATTTGAGGAAGAAGAAGGTGAGTTAGAGGAAGGAAGAAGAGGAAGAAGAAGAGGAAGAAGAGGAAGAGGAGGAAGACTTTGA<br>GGAAGAGGAAGAGGATGAAGAGGATTTGACAGTTATTAATATCAACAGCAGTGATGAAGAGGGGGAGG                                                       |
| A12    | GGGTGCAGCAGCAGAAGACGGCTCGAAGCAACATGGACAACATGTTTCGAGAGCTACATCAACAACCTTAGCGCGCAGCTGGAGACTTGGGCCAGG<br>AGAAGCTGAAGCTGGAGGCGGAGCTTGGCAACATGCAGGGGCTGTGGAGGACTTCAAGAAACAAGTATGAGGA                                              |
| B01    | GGGGATGACTGTGGGCGACAGCTCGGACGAGCTGGCTGCCACATCAATGAGTGTCTCAGCCGCAAGCTCAGTGGCTGCAGCCAGGACTGTGAGGAC<br>TCAAGATCGGCTCAAGTGCCGCTGTGCGCCCTGGCTCCGGCTGAAGGATGACGGCG                                                               |
| B02    | GGGGACGAAGAAGAGGAAGAAGGTGGGGAGGAAGAGGAGGAGGAAGAAGAAGGTGATGTTGAGGAAGAGGATGGAGATGAAGATGAGGAAGCTGAG<br>TCAGTACGGGCAAGCGGCGAGCTGAAGATGATGAGGATGACGATGTCGATACCAAGAAGCAGA                                                        |
| B03    | CGCCACAGTGC AAGGCTTTGTATGCCTATGACGCTCAGGACACAGACAACTCAGCTTTAATGCCAATGACATTATTGATATTATCAAGAAGAT<br>CCTTCTGGCTGGTGGACGGGTGCAGTACGAGGCAAGCAGGGCCTGTTCCCAACAACATATGTTACCA                                                      |
| B04    | GGGGGACCGGGTCCGGTGCAGGATGCCCTTCTGTCTGGGAAACGGGGCGGGCCGGAAGGCGGGCCCCCTCGCCGTCACGCACCCGACG<br>TCTGTGGGAACTCGGCTAAACCATTCTGAGACAAACCTTGTGTCGAGGGCTGACTTCAAT                                                                   |
| B05    | CGGCCTGTGAGCCCCCTTGTCTGGAGGTGGACCCCAACATCCAGGCCGTGCGCACCCAGGAGAAGGAGCAGATCAAGACCCCTCAACAACAAGTT<br>TGCCCTCTTATAGACAAGGTACGGTCTCTGGAGCAGCAGAACAAGTGTGGAGACCA                                                                |
| B06    | GGGTGGCTGTAGTGCCTATGCCGATCGGGTGTCCGCACCAAGTTCGGCATCAATATGGTGACCTCCCGGAGCGGGGACCACCAGGTTGCCA<br>AGGAGGGTGAACCGGCCAGGTCCGAAACGGAGCAGGTCAAACCTCCAGTGC                                                                         |
| B07    | GGGTGAATCTACAGGATCAGGACAGAGACCTCAACCATAGTCTTGTCTTCAAGTAAGAAGGTTCTGCTGGAGAATATCGGCAGAGAGATAG<br>CATAGCCAGCAGAACTCGGTCTAGGTCTCAGACACCAACAACACTGTACCTATGAAAAGTGAACGAGA                                                        |
| B08    | GGGGGAAAAATGTAATCAAACACATAACAGTGTCAATTTTATTTTTATTTTTGCTCAATTGCTATTTAAACCAATGGAAGTTAGTATCAT<br>TGCAACATTTACTGTAATATGAGTGTATTGATATGAAGGTTTCAGGAGGTGGTCAATTTGTGTAGCC                                                          |
| B09    | GGGGGTAGCTGCCTATTTGGGATGGACCACAATGTTGATCAAACCTGGGAAAGCTGTATCATCAACAAAAGTGAACACAAGAATCCCTGAAC<br>AGAGTTCTCAGAACATATAAAGGATG                                                                                                 |
| B10    | GGGAGAGCGATTACATTAAGCTCTATGTGCGCCGTGATTCATCAGACGACTTCCATGATATGATGCCTAAATACCTCAATTTTGTCAAGGGTG<br>TGGTGACTCAGATGATCTCCCTTGAATGTTTCCCGCAGACTCTTCAGCAAC                                                                       |
| B11    | N. D. <sup>b</sup>                                                                                                                                                                                                         |
| B12    | GGGCTGGCAGCTTTGGGTAGAAGAGAACTAGATGACAGAGATCACTATGGAACAAGAGATTGGATCTTGTGGGCCGCTGCTTGCATTCTTATTT<br>AGAGGTATGTTTAAAGAAATTTGCTTAAAGAAGTGCAGTCTATGCACAGAAATTTATTGATCGAGGAA                                                     |
| C01    | N. D. <sup>b</sup>                                                                                                                                                                                                         |
| C02    | CGGATGGAGACTACACCAGCCAAAGGAAAGAAAGCTGCAAAAAGTTGTTCTGTGAAAGCCAAGAAGCTGGCTGAGGATGAAGATGAAGAAGAGGAT<br>GATGAGGACGAGGATGACGACGACGACGAAGATGATGAAGATGATGATGAAGATGAGCAGG                                                          |
| C03    | GGGAGGGGAGGAAAGGGGAAAGCGGGCAACCACTTTTCCCTAGCTTTTCCAGAAGCTGTTAAAAGCAAGGTCTCCCCACAAGCAACTTCTCTG<br>CCACATCGCCACCCCGTGCCTTTTGTATGATGACAGACACCTTCCACCCCTCACCTCTATGCAGCCAGAAGC                                                  |
| C04    | N. D. <sup>b</sup>                                                                                                                                                                                                         |
| C05    | CGGAGTTGAAAGACACACAGAGGTCACAGTCTGGAATTGACAGTGGTGGATTGCAACCTATTTCACTCCAGAACTGCGTAGCGCCTTATACGCT<br>GCGGCAAGTGTGACGTCATTGAAACAACCATAGGCCCGCCCGGACTAGCCACGCCAC                                                                |
| C06    | GGGTCGTGCCAGCAAGCAGTGGTTTATAAACAATCACGGATTAAGACTGCAGCCAAGGAATGTTAAAAAGGTGAAATTTATTCTGGATCAGC<br>ACTGAATGGCATGGTTGAAATGATGGACAGGCGCCATATTGGTGTATATCAAGGCAAG                                                                 |
| C07    | GGGGACATGAACGAGGCAAGCGGAGGTTGCGCGAGCTCTACCGCCTGGTATCGGGAGGTGCCAACACTGTGCACCAATTCAGCTGGACATC<br>ACTGTGAAAAATGGGACGGGATAAAGTCCGAGAATGTTTATGAAGAATGCCATGTACAGACCCCAAGGTTGGTGTATCTTCTGGTCATTAAGGGA<br>AAGATCGAACTGGAAGAAACAATG |
| C08    | GGGCGTGATACGACGATGACATTTCCCGCTTCCCACTCCAAAGTCCGCAAGAAGCGTATCCCGCTGAGCGCGGTGGCGGGGGCGTCATCCG<br>TCAGTCCCTCTAGTTACGCAGGAGTGCCTGTCGCGCACCAACACAGTGGC                                                                          |

C09 GGGCATCGATGAGGCCATGAGCTATGCCGAGGTCATGAGGCTGGTGAAGGCCATGAACTTCTCGGTGGTGGTATTTGACACGGCACCCACGGGCCA  
CACCTTGAGGCTGCTCAACTTCCCCACCATCGTGGAGCGGGGCTGGGCCGGCTTATGCAGATCG

C10 GGGGAGCCAAAGATCGTACCACTGCACTCCAGCTGGGTGACAGAGTGAGACTCTGTCTCCAAAAAAAACCTTTGCTTGTATATTATTTTGCCTTA  
CAGTGGGAGATTATGATGGAAGGACAATAAGATTTTTTCAAATGTGTATGCCAGG

C11 GGGTGGGGTTAATCTGATGCCCTACTCCCGCCTATAATGTCAATCCATGAATATGAACACCTTGAATGCCATGAACAGCTATCGAATGACACAGC  
CCATGATGAACAGCAGTTACCATAGTAACCTGCCTACATGAACCAGAAAGCGA

C12 GGGGATGAGGCAGGAATCAAAGACAGATACTCCGACATAGGGTGTCCGGCTCCAGCGTCTCGAATGTATCGCGTGACACCCCCAGACGAA  
AATACCAAATGCATGGAGAGCTCCCGTGAAGTAAATAGGGTGTAGACCTGTATCCATCGTGTCTTTAAGGGGAACGTGTGGGCTAT  
TTAGGCTTTATGACCTGAAGTAGGAACAGATGTCGGATACAGTTCACTTTAGCTACCCCAAGTGTATGGACCC

D01 N. D. <sup>b</sup>

D02 GCCTCAGTGGACATATACATGAGCAACCCAGAGAAATTCAGTGTCTGTCTATCTCTGCATGGATCAGAGACTTACTTAGGAAAGAAAA  
ATGTGGGGAGATTATGATGAAGACCTCCCAAATGTCCCGCATGGACATCCTAGCATCATATGGCC

D03 GGGTGTCTCGGGGAATAGGTTATGTGATTAGGAGTAGGGTTAGGATGAGTGGGAAGAAGAAAGAGAGGAAGTAAAGTTAATTATGCCTTTTGGG  
TTGAGGTGATGATGGAGGTGGAGATTTGGTGTGTGAAATGTTTTAGTAAAGCTTTCTAGTCAGG

D04 N. D. <sup>b</sup>

D05 N. D. <sup>b</sup>

D06 CGGAGCTACTCGGGAGGCTGAGGCTGGAGGATCGTTGAGTCCAGGAGTCTGGGCTGTAGTGCCTATGCCGATCGGGTGTCCGCACTAAGTTCCG  
GCATCAATATGGTGACCTCCCGGAGCGGGGACCACAGGTTGCCTAAGGAGGGGTGAACCGGGCC

D07 GCGGGAAGAGGACGAGGACGACGAGGAGGAGGAGGAGGAGGAAAAAGAAAGAGTCTCATCGTGAAGGCAAGAGGGAAAAAGAAAGTATGAGAG  
GTTGACAATGCAAGTCTCTTACAGAGAGAGCCATTTACAATTCACAAGGAAAGGGG

D08 GGGACTGTGCCTTTAGCCTTTTCTGTTCTGCTCAAAACACTTTGACAAAGCTCACCAACTTTAAATATTAAGTTTTAAAAAATCAAATATG  
AAGTATGTTGACAAAGGCATAATTTCTAAAAACACACAGAAATCGCTTGAAGTGGAGAAAAATCC

D09 N. D. <sup>b</sup>

D10 CGCTGACCCGAGATGACTCAAGTGGTGGATGGTTACCCTGGAGGGAGTGGACTAAGCAGCGTCACTGTCTTCAAAGTCCCTCATCAGGAAGAGA  
ATGGCTGTGCTGACTTTTTTATCCGTGGAGAGCGACTCAGGGGCA

D11 CGGCAGAATCCTAGTACCCTAGCCCTCCAAAGATAACTCATACAAAGAGTAAAGCAGAAAAAGTGGATGTGTTGAGGAAAAAACCTTGCACCTC  
TAAAGACATCTGATAATACAGTTTTGAAAAAGAACTTAGCGCTGTGTAACAGTGTATAGCCAAT

D12 GGGCAATTCAGGGAGATAGAATAATTGTTAACTGAAAGCATGGGTGGGATGTGTTAAAGCAATAGCTGGGCATGGTAACTGCACCTGTAGTC  
TCAGCTACTTGGGAGGTGGAGGACGAGGATCCCATGAGCTAGGGAGTTGGAGTCC

E01 GGCCAAACCTCCTGCTGCTGTGAAGCTGGCGTGGAGTCCATCTGCTGCTGTGGGGAAAGCACCACAGACTGGAAGCAGATCCGCTCCATCAT  
CATGCGGAGAACTTCATCCCCACCATCGTCAACTCCTGACAGAGGAGATCAGTGACGCCATAAGGA

E02 CGGGTAAGTGAAGATCCCCAGCATATGACCATGTATCAAACCTGTAGGAGAAATCAAAGAGACTCTTATCTTCTGCTGCCTGGTCATAC  
TAGACTGAGAAACCAGATAACAGAAGTCTTGGATCTGGATCTGATAAAGCAGGAAGCAGTA

E03 GGGGATGTGAGGGCGATCTGGCTGCGACCTGTGACCCCATTTGATCGCCAGGGTTGATTGGCTGATCTGGCTAGGCGGGTGTCCCTTC  
TCCCTCACCGCTCATGTGCGTCCCTCCCAAGTGCAGCTCGGTGCAAGAGGACGACCATCCCGGATAGA

E04 GGGGAGTTGTTTTCTGGAGATAAGTTAACATGTGAAACCATACTGCAATAATTTTAGCCAGAAAGTTGAGAATATTTGAAACAGTGTCTGCT  
TTTTGAAATAAAGAAATTAGAGGGCGTGGTGGTGGGACCTGTAGTCACAGCTACGTGGGAGGCTGAGACAGGAGAA

E05 GGCACATCAGCACATGCCGGGCGAGAGATGGCCAGATCTGACGCGAGCTGGGCACTGTCTGTGGGCAAGTGCACGGAGCCGGGGGCC  
TTTGGGAGATGTGTGAGAAGTGCCCACTGCCCGGATGCATGCGACAACAA

E06 GGGACGAGACGTGGGGCGTAACAAAGGCAGCAGAGAAACAAATGAAGGACAAACAGGACGAGGAGCAGAGGCTTAAAGGAGGAGGAAGACAAG  
AAACGCAAAGAGGAGGAGGAGGAGGACAGGACAAGGAGGATGATGAGGACAAAGATGAGGATGAGGAGGATGAGGAGGACAAGGAGGAAGACG

E07 N. D. <sup>b</sup>

E08 CGGATATCAATCACCAGAGAACAGTAAGGGAGAAAGAAAGAAATTTGGTAGACTGTCACTGAACTGGAAAACTAAATAAAGAACTTAGGCT  
TCTCAATCAGGAAAAATCAGAAGTCTTGTGTAACAGGGTCTGTACAGCTGCAAGCAGATCGCAATC

E09 GCCAGGATTTGGGGAGGAGGGGCTTTGGGTTCTGTGTTGTGCATATGAAGGGAGATGGGGTTAGGTGGAGGAGGAGCAGCGTGGTTAGCT  
AAGGTTATTTGCTTTTTGTGGCAAACTAAAAAA

E10 GGCCTCGGCTCGTGCCTGATGAAGAACGACGCTAGCTGCGAGAATTAATGTGAATTCAGGACACATTGATCATCGACACTTCGAAACGCACTTGC  
GGCCCCGGTTCTCCCGGGCTACGCCTGTCTGAGCGTGCCTAAGAGTGCAGTGTCCACCTA

E11 GGGCAGTGGTGCAGCCTTATGTGGAATCAAATCTTTAGTTCCTATGGGTGGTGTAGGAGGACAGGTTCAAGTGTCCAGCCAGGAGGGAGTTAG  
CACAAGCCCCACTACATCCTCCAGCAAGCAGTTTTGGAGAGTACACTT

E12 GGGGAGCGTCTTTCGCTGGCAGGCCAGCTCCTTGCCTGCTGATGACCTTTGCACAGAAAAATGCCATCATGCTGAAACGATTCAATAGGTATCCGCTG  
ATCATTGACCCCTCTGGACAGGCCACAGAATTCATTATGAATGAATAAAGGATCGTAAGATCACACGGACCTA

F01 GGGGGTGTCCCTGGACGACGCGGGGCGGAGCAAGTTCGCGTATCACGGACGAGAACTGGAGAGAACTGTGGAAGGAGACTGGATGATAGAA  
TTTTATGCCCGTGTGCCCTGCTTGTCAAATCTTCAACCGGAATGGGAAAGTTTTGCTGAATGGGG

F02 CGCCATGCCTGAATTTGAAACCAAGTGAACAATCAAAGCCAAAAAGAGTTACATTGCCACACAAGGCTGCCTGCAAAAACAGGTGAATGACTT  
TTGGCGGATGTTGTTCAAAGAAAATCCCGAGTGATTGTATGACAACGAAAGATATAGA

F03 N. D. <sup>b</sup>

F04 GGCCCGCTGGAGTCCAGCTGCAGGACACTCAGGAGTGTGTCAGGAGGAGAAACCGGACAGAGTGTGAGCCTGAGCACCAGCTCAAGCAGGTGG  
AGGACGAGAAGAAATCTTCCGGGAGCAGCTGGAGGAGGAGGAGGCAAGCACAACCTGGAGA

F05 GGGCAGAGGACGACCATCCCGATAGAGGAGCCGGTCTTCCGTCAAGGTTATACAGTAGTGCCTCCCTGCTAGAACCTCAAACAAGC  
TCTCAAGTCCATTTGATGAGAGAACGTAGGGTGTCAAGCTTCAAGACATTG

F06 GGGGTATACATTAGGGATGAGAAGGATGAGTATATATGATAGGATGAAGGAGGATGAGTATATATGATGAAGATGAAGGAAGTGAATATATATGATG  
GAATGAAGGAGGATGATACATATGTAGAAATAAAGAAAGATGAGTGTACATGTAGGTATGTGA



Table S2. Percent of extended primer in the presence of indicated RNAs

|             | Sample | Percent extension       | with RNA selected using R-CAMPs |                   |                     |                   |                     |                   |                     |                   |
|-------------|--------|-------------------------|---------------------------------|-------------------|---------------------|-------------------|---------------------|-------------------|---------------------|-------------------|
|             |        |                         | Sample <sup>c</sup>             | Percent extension | Sample <sup>c</sup> | Percent extension | Sample <sup>c</sup> | Percent extension | Sample <sup>c</sup> | Percent extension |
| No RNA      | 0 min  | 2.0 ± 0.5 <sup>a</sup>  | A1                              | 63.5              | C1                  |                   | E1                  | 60.2              | G1                  | 44.4              |
| No RNA      | 60 min | 70.2 ± 9.6 <sup>a</sup> | A2                              | 60.3              | C2                  | 66.6              | E2                  | 68.7              | G2                  | 55.7              |
| With tRNA   |        | 68.2 ± 2.9 <sup>b</sup> | A3                              | 53.5              | C3                  | 77.5              | E3                  | 66.3              | G3                  | 39.2              |
| With MS2RNA |        | 76.8 ± 8.4 <sup>b</sup> | A4                              | 22.1              | C4                  | 57.4              | E4                  | 54.4              | G4                  | 44.4              |
|             |        |                         | A5                              | 51.7              | C5                  | 55.8              | E5                  | 59.6              | G5                  | 51.2              |
|             |        |                         | A6                              |                   | C6                  | 69.9              | E6                  | 43.7              | G6                  | 57.5              |
|             |        |                         | A7                              | 53.1              | C7                  | 68.6              | E7                  | 44.2              | G7                  | 63.4              |
|             |        |                         | A8                              | 60.4              | C8                  | 60.0              | E8                  | 62.9              | G8                  | 62.4              |
|             |        |                         | A9                              | 55.7              | C9                  | 59.2              | E9                  | 54.4              | G9                  |                   |
|             |        |                         | A10                             | 58.4              | C10                 | 57.9              | E10                 | 65.9              | G10                 | 31.9              |
|             |        |                         | A11                             | 33.5              | C11                 | 77.5              | E11                 | 67.7              | G11                 | 66.8              |
|             |        |                         | A12                             | 37.9              | C12                 | 79.6              | E12                 | 55.4              | G12                 | 48.5              |
|             |        |                         | B1                              | 63.5              | D1                  | 59.5              | F1                  | 69.3              | H1                  | 73.9              |
|             |        |                         | B2                              | 63.9              | D2                  | 66.8              | F2                  | 65.8              | H2                  | 58.8              |
|             |        |                         | B3                              | 71.6              | D3                  | 53.1              | F3                  | 56.8              | H3                  | 60.2              |
|             |        |                         | B4                              | 68.4              | D4                  | 58.2              | F4                  | 46.1              | H4                  | 45.7              |
|             |        |                         | B5                              | 58.5              | D5                  | 69.6              | F5                  | 60.1              | H5                  | 60.6              |
|             |        |                         | B6                              | 59.9              | D6                  | 72.3              | F6                  | 54.7              | H6                  | 59.9              |
|             |        |                         | B7                              | 63.2              | D7                  | 65.5              | F7                  | 70.2              | H7                  | 64.6              |
|             |        |                         | B8                              | 70.3              | D8                  | 68.6              | F8                  |                   | H8                  | 67.9              |
|             |        |                         | B9                              | 66.2              | D9                  |                   | F9                  | 46.6              | H9                  | 79.0              |
|             |        |                         | B10                             | 82.6              | D10                 | 75.9              | F10                 | 64.0              | H10                 | 66.1              |
|             |        |                         | B11                             | 55.9              | D11                 | 67.9              | F11                 | 49.4              | H11                 | 71.5              |
|             |        |                         | B12                             | 76.4              | D12                 | 63.8              | F12                 | 43.4              | H12                 | 51.4              |

a) Values are average ± s.d. obtained from 8 replicates.

b) Values are average ± s.d. obtained from 3 replicates.

c) For samples without percent extension given, sufficient RNA was not obtained to enable the assay to be performed. Samples highlighted in red had high levels of inhibitory activity of RdRp.



Table S4. Sequences of oligonucleotides used for experiments

| Oligonucleotide primers for construction of fragmented cDNA library   |                                                                              |                                                                                                                                                     |
|-----------------------------------------------------------------------|------------------------------------------------------------------------------|-----------------------------------------------------------------------------------------------------------------------------------------------------|
| A-T7-read2                                                            | CCATCTCATCCCTGCGTGTCTCCGACTCAGTAATACGACTCACTATAGGGTTCAGA<br>CGTGTGCTCTTCCGAT |                                                                                                                                                     |
| trP1-read1                                                            | CCTCTCTATGGGCAGTCGGTGATACACTCTTCCCTACACGACGC                                 |                                                                                                                                                     |
| Oligonucleotide primers for amplification of template DNAs            |                                                                              |                                                                                                                                                     |
| A-primer                                                              | CCATCTCATCCCTGCGTGTCTCCGACTCAG                                               |                                                                                                                                                     |
| B-trP1 primer                                                         | CTATCCCCTGTGTGCCTTGGCAGTCTCAGCCTCTCTATGGGCAGTCGGTGAT                         |                                                                                                                                                     |
| Oligonucleotide for preparing R-CAMPs                                 |                                                                              |                                                                                                                                                     |
| capture primer <sup>a</sup>                                           | ATCGGAAGAGCACACGTCTGAACCC-link-CAGTAATACGACTCACTATAGGG                       |                                                                                                                                                     |
| Oligonucleotides for preparation of template DNAs of G10 RNA variants |                                                                              |                                                                                                                                                     |
| G10-core<br>(primer extension)                                        | sense                                                                        | TAATACGACTCACTATAGG                                                                                                                                 |
|                                                                       | antisense                                                                    | TTTGCTTTTCTTTCCTCTCTCTCCTTCCTTCCTTTCCTCTCCTTCCTTCCTTTCT<br>CTCCCTCCTTCCTTCCTTTCTCTCCCTCCTTCCTTCCTCTCCTTCCTTCCTTC<br>CTCTCCCTCCTTCCTATAGTGAGTCGTATTA |
| G10-short<br>(primer extension)                                       | sense                                                                        | TAATACGACTCACTATAGG                                                                                                                                 |
|                                                                       | antisense                                                                    | TTTGCTTTTCTTTCCTCTCTCTCCTTCCTTCCTTTCCTCTCCTTCCTTCCTTTCT<br>CTCCCTCCTTCCTTCCTTTCTCTCCCTCCTTCCTTCCTATAGTGAGTCGTATTA                                   |
| G10-stem<br>(PCR)                                                     | sense                                                                        | TAATACGACTCACTATAGG                                                                                                                                 |
|                                                                       | template <sup>b</sup>                                                        | –                                                                                                                                                   |
|                                                                       | antisense                                                                    | CCTTTTACACGACGCTCTTCCGATCT                                                                                                                          |
| Oligonucleotides for primer extension assay                           |                                                                              |                                                                                                                                                     |
| FAM-labelled primer <sup>c</sup>                                      | FAM-GUCAUUCUCCUAAGAAGCUA                                                     |                                                                                                                                                     |
| Template RNA                                                          | CUAUCCCCAUGUGAUUUUAAUAGCUUCUUAGGAGAAUGAC                                     |                                                                                                                                                     |

a) “-link-” indicates oligo ethylene glycol linker.

b) Template is a PCR product for transcription of G10 RNA amplified by A-T7 primer and B-trP1 primer.

c) “FAM” indicates carboxyfluorescein.

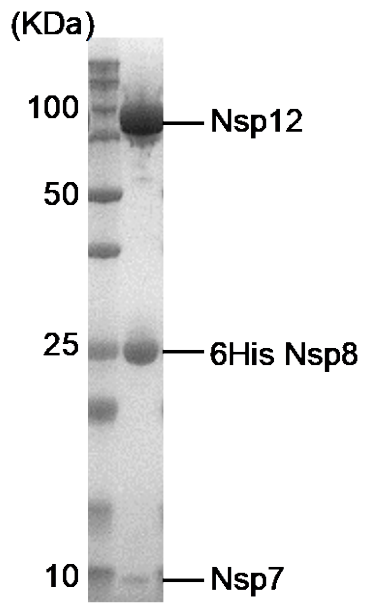

Figure S1. SDS-PAGE image of purified, recombinant, His-tagged SARS-CoV-2 RdRp

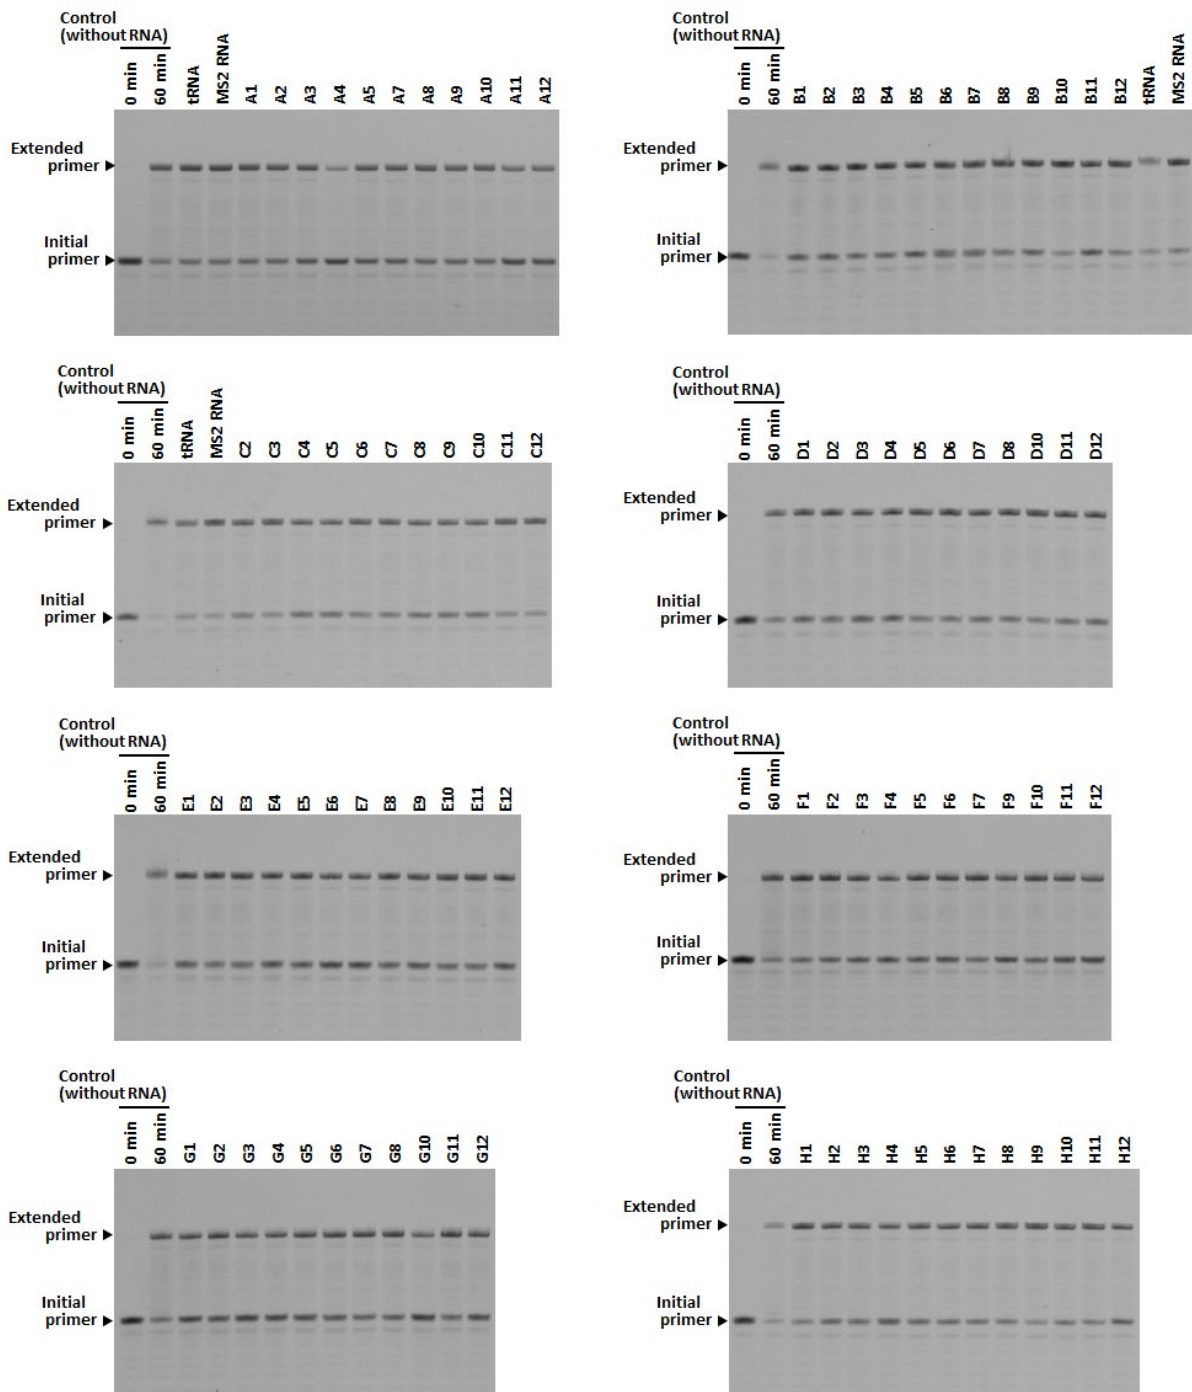

Figure S2. Polymerization products in the presence of indicated RNAs. Polymerization reaction by RdRp was performed in the presence of selected RNAs, tRNA, or MS2 RNA at 250 ng/ $\mu$ L for 60 min. Polymerization products were electrophoresed in denaturing polyacrylamide gels and imaged using a fluorescence image scanner. Control samples are products without additional RNA after 0- and 60-min reaction times.

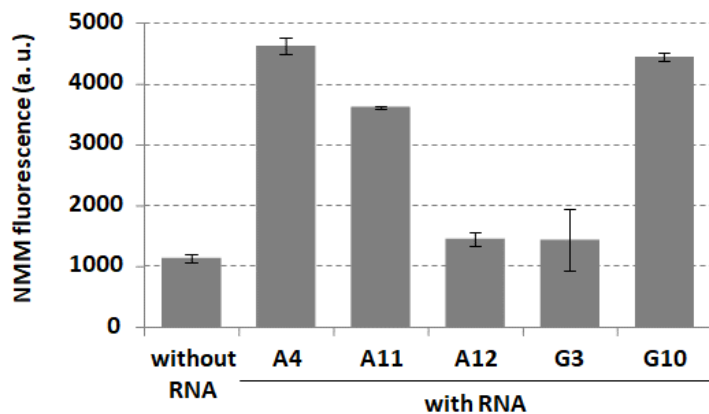

Figure S3. Fluorescence intensity of NMM mixed with selected RNAs. RNAs (100 nM) were mixed with 1  $\mu$ M NMM in a buffer containing 50 mM MES-LiOH (pH 7.0), 100 mM KCl, 0.5 mM MgCl<sub>2</sub>, 0.1% DMSO, and 0.01% Tween20. Fluorescence intensity of NMM at 615 nm was measured after 400-nm excitation. Values are average  $\pm$  s.d. obtained from individually prepared triplicates.



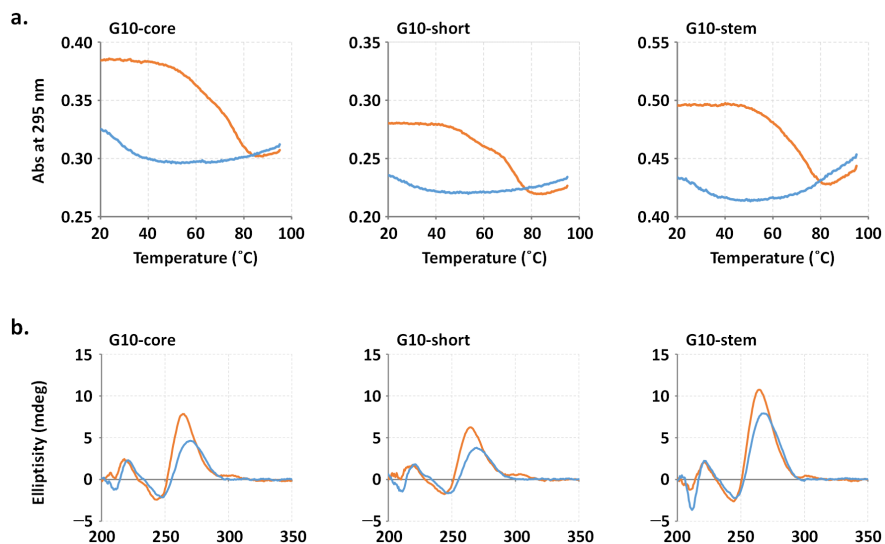

Figure S5. Spectroscopically analyzed G4 formation on RNA. Melting profiles of absorbance at 295 nm (a) and CD spectra at 37 °C (b) of 3  $\mu$ M RNAs were measured in a buffer containing 50 mM MES-LiOH (pH 7.0), and 0.5 mM  $MgCl_2$  in the presence of 100 mM KCl (orange) or 100 mM LiCl (blue). Buffer for CD spectra analyses also contains 0.01% Tween 20.

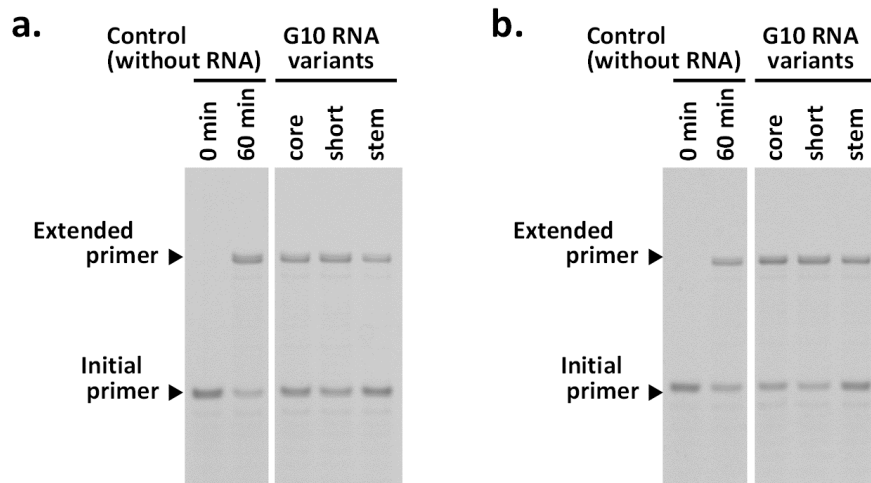

Figure S6. Gel analysis of primer extension reactions to evaluate effects of G-quadruplex formation on inhibition of RdRp. Polymerization reaction was performed in the presence of 2  $\mu$ M RNA variants in a reaction buffer containing (a) 100 mM KCl or (b) 100 mM LiCl. Polymerized products were electrophoresed in denaturing polyacrylamide gels and imaged using a fluorescence image scanner. Control samples are products without additional RNA at 0- and 60-min reaction times.

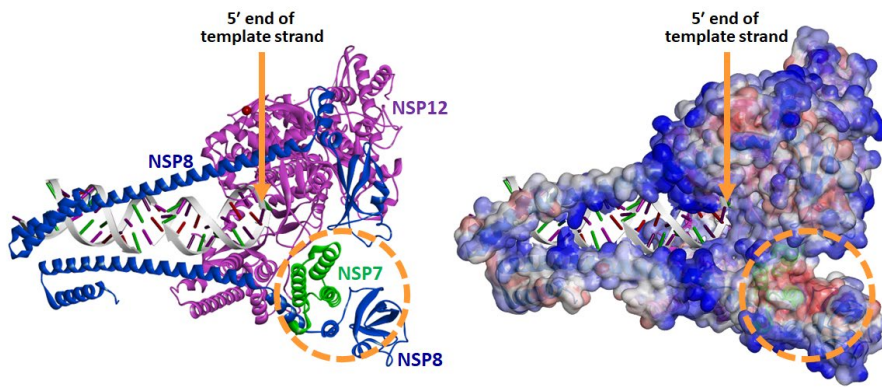

Figure S7. Hydrophobic regions in RdRp complexed with substrate RNA duplex (PDB ID: 6YYT). Views from side, at which template RNA strand is incorporated, are shown. At the image on right, hydrophilic and hydrophobic regions on the protein surface were visualized by blue and red, respectively, using Discovery Studio Visualizer. Hydrophobic region between Nsp7 and Nsp8 subunits is shown by orange circle.
