# Supplementary material for: Endogenous G-quadruplex-forming RNAs inhibit the activity of SARS-CoV-2 RNA polymerase
Source: Royal Society of Chemistry journal article supplement (doi:10.1039/d2cc05858h), 2022-12-16
Supplement: d2cc05858h2.pdf [file d2cc05858h2.pdf]

**Table S3. Genomic sequence variations at region from 107977150 to 107976780 in chromosome 7 in which G10 RNA was aligned.**

Variations in the sequence region was downloaded from LAMB1 gene in Homo sapiens chromosome 7, GRCh38.p14 Primary Assembly (Gene ID: 3912, updated on 12-Aug-2022)

##fileformat=VCFv4.3

##source=dbSNP

##track\_name="Live RefSNPs, dbSNP b155 v2"

##sequence\_region="NC\_000007.14 107976780 107977150"

>NC\_000007.14:c107977150-107976780 Homo sapiens chromosome 7, GRCh38.p14 Primary Assembly

```
TGTTCTTACCTGAACTCCCTCCCATCTTCCTTCCTCTCTTTTCCTTTCTTTCTCTCTCTCCTTCCTTCCTTTCTCTCTCCTTCCTTCCTTTCTCTTGTCTCCTTCCTTCCTTTCTCT
sense strand TGCTCCTTCCTTCCTTTCTCTCTCTCCTTCCTTCCTTTCTCTCCTTCCTTCCTTTCTCTCCCTCCTTCCTTTCTCTCCTTCCTTCCTTTCTCTCTCTCCTTCCTT
CCTTTCTCTCCCTCCTTCCTTCCTTTCTCTCCCTCCTTCCTTCCTTTCTCTCTCTCCTTCCTTTCTCCCTTCCCTTCCTCCCTCCCTTCCTTCTCCATGTTAAGTATCC
ATCA
TGATGGATACTTAACATGGAGAAGGAAGGGAGGGAGGGAGGAAGGGAGGGAGAAAGGAAGGAAGGAGAGAGAGAAAGGAAGGAAGGAGGGAGAGAAAGGAAGGAAGGAGGG
antisense strand AGAGGAAAGGAAGGAAGGAGAGAGAGAAAGGAAGGAAGGAGGAAGAGGAAAGGAAGGAAGGAGGGAGAGAAAGGAAGGAAGGAGGGAGAGAAAGGAAGGAAGGAGAGAGAGGA
AAGGAAGGAAGGAGCAAGAGGAAAGGAAGGAAGGAGCAAGAGGAAAGGAAGGAAGGAGAGAGAAAGGAAGGAAGGAGAGAGAAAGAAAAGGAAAAGAGAGGAAGGAAGATG
GGAGGGAGTTCAGGTAAGAACA
```

##INFO=<ID=RS,Number=1,Type=String,Description="dbSNP ID">

##INFO=<ID=Source,Number=1,Type=String,Description="Variation source">

| #CHROM       | POS       | ID REF                                                                                                                                                                                                                                                  | ALT                                                                                   | INFO                         |
|--------------|-----------|---------------------------------------------------------------------------------------------------------------------------------------------------------------------------------------------------------------------------------------------------------|---------------------------------------------------------------------------------------|------------------------------|
| NC_000007.14 | 107976781 | rs1422143953 G                                                                                                                                                                                                                                          | T                                                                                     | RS=rs1422143953;Source=dbsnp |
| NC_000007.14 | 107976788 | rs2033865264 C                                                                                                                                                                                                                                          | T                                                                                     | RS=rs2033865264;Source=dbsnp |
| NC_000007.14 | 107976795 | rs1193034604 T                                                                                                                                                                                                                                          | G                                                                                     | RS=rs1193034604;Source=dbsnp |
| NC_000007.14 | 107976796 | rs1424802563 C                                                                                                                                                                                                                                          | T                                                                                     | RS=rs1424802563;Source=dbsnp |
| NC_000007.14 | 107976797 | rs1258700924 C                                                                                                                                                                                                                                          | A                                                                                     | RS=rs1258700924;Source=dbsnp |
| NC_000007.14 | 107976803 | rs2033865455 A                                                                                                                                                                                                                                          | G                                                                                     | RS=rs2033865455;Source=dbsnp |
| NC_000007.14 | 107976804 | rs2033865505 T                                                                                                                                                                                                                                          | A                                                                                     | RS=rs2033865505;Source=dbsnp |
| NC_000007.14 | 107976805 | rs768164477 C                                                                                                                                                                                                                                           | A                                                                                     | RS=rs768164477;Source=dbsnp  |
| NC_000007.14 | 107976806 | rs1369568055 T                                                                                                                                                                                                                                          | C                                                                                     | RS=rs1369568055;Source=dbsnp |
| NC_000007.14 | 107976811 | rs2033865680 T                                                                                                                                                                                                                                          | C                                                                                     | RS=rs2033865680;Source=dbsnp |
| NC_000007.14 | 107976813 | rs1258229208 CTCTCT                                                                                                                                                                                                                                     | CTCT                                                                                  | RS=rs1258229208;Source=dbsnp |
| NC_000007.14 | 107976815 | rs1200018769 C                                                                                                                                                                                                                                          | T                                                                                     | RS=rs1200018769;Source=dbsnp |
| NC_000007.14 | 107976816 | rs1315476360 TCTTTTCTTTTCTTT                                                                                                                                                                                                                            | TCTTT                                                                                 | RS=rs1315476360;Source=dbsnp |
| NC_000007.14 | 107976818 | rs1035992660 TTTT                                                                                                                                                                                                                                       | TT                                                                                    | RS=rs1035992660;Source=dbsnp |
| NC_000007.14 | 107976818 | rs2033866028 T                                                                                                                                                                                                                                          | TCTC                                                                                  | RS=rs2033866028;Source=dbsnp |
| NC_000007.14 | 107976818 | rs1245386197 T                                                                                                                                                                                                                                          | C                                                                                     | RS=rs1245386197;Source=dbsnp |
| NC_000007.14 | 107976819 | rs1323354528 T                                                                                                                                                                                                                                          | C                                                                                     | RS=rs1323354528;Source=dbsnp |
| NC_000007.14 | 107976820 | rs1310295228 T                                                                                                                                                                                                                                          | C                                                                                     | RS=rs1310295228;Source=dbsnp |
| NC_000007.14 | 107976822 | rs1451567481 C                                                                                                                                                                                                                                          | A                                                                                     | RS=rs1451567481;Source=dbsnp |
| NC_000007.14 | 107976823 | rs1562999951 C                                                                                                                                                                                                                                          | A,T                                                                                   | RS=rs1562999951;Source=dbsnp |
| NC_000007.14 | 107976824 | rs2033866255 TTTT                                                                                                                                                                                                                                       | TTT                                                                                   | RS=rs2033866255;Source=dbsnp |
| NC_000007.14 | 107976827 | rs1382310936 T                                                                                                                                                                                                                                          | C                                                                                     | RS=rs1382310936;Source=dbsnp |
| NC_000007.14 | 107976828 | rs1562999957<br>CTTTCCTCTCTCCTTCCTTCCTTTCTCTCC<br>TTCCTTCCTTCCTTCCTTCCTTCCTTC<br>CTTTCCTCTTGCTCCTTCCTTCCTTCCTCTCT<br>CTCCTTCCTTCCTTCCTTCCTC                                                                                                             | CTTTCCTCTCTCCTTCCTTCCTTTCTCTCC<br>CTTTCCTCTCTCCTTCCTTCCTTTCTCTCC                      | RS=rs1562999957;Source=dbsnp |
| NC_000007.14 | 107976828 | rs796935337<br>CTTTCCTCTCTCCTTCCTTCCTTTCTCTCC<br>TTCCTTCCTT                                                                                                                                                                                             | CTTTCCTCTCTCCTTCCTTCCTTTCTCTCC<br>TTCTTCCTTTCTCTCTCTCCTTCCTTCCTTT<br>CCTTCCTTCCTTCCTT | RS=rs796935337;Source=dbsnp  |
| NC_000007.14 | 107976828 | rs2033866355 C                                                                                                                                                                                                                                          | A                                                                                     | RS=rs2033866355;Source=dbsnp |
| NC_000007.14 | 107976829 | rs2033866506 T                                                                                                                                                                                                                                          | G                                                                                     | RS=rs2033866506;Source=dbsnp |
| NC_000007.14 | 107976831 | rs2033866557 T                                                                                                                                                                                                                                          | C                                                                                     | RS=rs2033866557;Source=dbsnp |
| NC_000007.14 | 107976832 | rs2033866597 CC                                                                                                                                                                                                                                         | CCC,CCCC                                                                              | RS=rs2033866597;Source=dbsnp |
| NC_000007.14 | 107976833 | rs918830045 CTCTCTCTC                                                                                                                                                                                                                                   | CTCTCTC                                                                               | RS=rs918830045;Source=dbsnp  |
| NC_000007.14 | 107976834 | rs2033866716 T                                                                                                                                                                                                                                          | C                                                                                     | RS=rs2033866716;Source=dbsnp |
| NC_000007.14 | 107976835 | rs2033866761 C                                                                                                                                                                                                                                          | T                                                                                     | RS=rs2033866761;Source=dbsnp |
| NC_000007.14 | 107976837 | rs989600200<br>CTCTCCTTCCTTCCTTTCTCTCCTTCCTTCCT<br>T                                                                                                                                                                                                    | CTCTCCTTCCTTCCTT,CTCTCCTTCCTTCCTTT<br>CCTTCCTTCCTTCCTTTCTCTCCTTCCTTC                  | RS=rs989600200;Source=dbsnp  |
| NC_000007.14 | 107976838 | rs116372349 T                                                                                                                                                                                                                                           | TT<br>C                                                                               | RS=rs116372349;Source=dbsnp  |
| NC_000007.14 | 107976839 | rs2033867056<br>CTCCTTCCTTCCTTTCTCTCCTTCCTTCCTTC<br>CTTTCTCTTGCTCCTTCCTTCCTTTCTCTTG<br>CTCCTTCCTTCCTTCCTTCCTTCCTTCCTTC<br>CTTTCCTCTCTCCTTCCTTCCTTTCTCTCC<br>CTCCTTCCTTCCTTCCTTCCTTCCTTCCTTC<br>CTTTCCTCTCTCCTTCCTTCCTTTCTCTCC<br>CTCCTTCCTTCCTTCCTTCCTC | CTCCTTCCTTCCTTTCTCTCCTTCCTTCCTTT<br>CCTTCCTTCCTTCCTTTCTCTCCTTCCTTC<br>TTCCTT          | RS=rs2033867056;Source=dbsnp |
| NC_000007.14 | 107976839 | rs796141882 CTCCTTCCTTCCTTTCTCTCCTTCCTTCCTT                                                                                                                                                                                                             | CTCCTTCCTTCCTTTCTCTCCTTCCTTCCTTT<br>CCTTCCTTCCTTCCTTTCTCTCCTTCCTTC                    | RS=rs796141882;Source=dbsnp  |
| NC_000007.14 | 107976839 | rs2033866950 C                                                                                                                                                                                                                                          | T                                                                                     | RS=rs2033866950;Source=dbsnp |
| NC_000007.14 | 107976840 | rs1346045767<br>TCCTTCCTTCCTTTCTCTCCTTCCTTCCTTC<br>TTTCCTCT                                                                                                                                                                                             | TCCTTCCTTCCTTTCTCTCCTTCCTTCCTTC<br>TTTCCTCT                                           | RS=rs1346045767;Source=dbsnp |
| NC_000007.14 | 107976840 | rs2033867107 TCCTTCCTTCCTT                                                                                                                                                                                                                              | TCCTTCCTT                                                                             | RS=rs2033867107;Source=dbsnp |
| NC_000007.14 | 107976842 | rs2033867222 C                                                                                                                                                                                                                                          | A                                                                                     | RS=rs2033867222;Source=dbsnp |
| NC_000007.14 | 107976844 | rs1232495293 T                                                                                                                                                                                                                                          | A,C                                                                                   | RS=rs1232495293;Source=dbsnp |
| NC_000007.14 | 107976852 | rs2033867355 TTCTCTCCTTCCT                                                                                                                                                                                                                              | TTCTC                                                                                 | RS=rs2033867355;Source=dbsnp |
| NC_000007.14 | 107976853 | rs2033867394 TCCTCTCCT                                                                                                                                                                                                                                  | TCCT                                                                                  | RS=rs2033867394;Source=dbsnp |
| NC_000007.14 | 107976854 | rs1370649597 CCTCTCCTTCCTTC                                                                                                                                                                                                                             | C                                                                                     | RS=rs1370649597;Source=dbsnp |

|              |           |              |                                                                                                                                                                                                                      |                                                                                                                                   |                              |
|--------------|-----------|--------------|----------------------------------------------------------------------------------------------------------------------------------------------------------------------------------------------------------------------|-----------------------------------------------------------------------------------------------------------------------------------|------------------------------|
| NC_000007.14 | 107976855 | rs1562999987 | CTCTCCTTCCTTCCTTTCTCTTGCTCCT<br>TCCTTCCTTTCTCTTGCTCCTTCCTTCCTTC<br>CTCTCTCCTTCCTTCCTTTCTCTCCCTCCT<br>TCCTTCCTTTCTCTCCCTCCTTCCTTCCTTC<br>CTCTTCCTTCCTTCCTTTCTCTCTCTCCT<br>TCCTTCCT                                    | CTCTCCTTCCTTCCTT                                                                                                                  | RS=rs1562999987;Source=dbsnp |
| NC_000007.14 | 107976855 | rs1562999981 | CTCTCCTTCCTTCCTTTCTCTTGCTCCT<br>TCCTTCCTTTCTCTTGCTCCTTCCTTCCTTC<br>CTCTCTCCTTCCTTCCTT                                                                                                                                | CTCTCCTTCCTTCCTT                                                                                                                  | RS=rs1562999981;Source=dbsnp |
| NC_000007.14 | 107976855 | rs1163127859 | CTCTC<br>CTCCTTCCTTCCTTCCTTTCTCTTGCTCCTTC<br>CTTCCTTTCTCTTGCTCCTTCCTTCCTTTCT<br>CTCTCTCCTTCCTTCCTTTCTCTCCCTCCTTC<br>CTTCCTTTCTCTCCCTCCTTCCTTCCTTTCT<br>CTTCCTTCCTTCCTTTCTCTCTCTCCTTC<br>CTTCCTTTCTCTCCCTCCTTCCTTCCTT | CTC                                                                                                                               | RS=rs1163127859;Source=dbsnp |
| NC_000007.14 | 107976857 | rs2033867895 | CTCTCCTTCCTTCCTTTCTCTTGCTCCTTC<br>CTTCCTTTCTCTTGCTCCTTCCTTCCTTTCT<br>CTCTCTCCTTCCTTCCTTTCTCTCCCTCCTTC<br>CTTCCTTTCTCTCCCTCCTTCCTTCCTTTCT<br>CTTCCTTCCTTCCTTTCTCTCTCTCCTTC<br>CTTCCTTTCTCTCCCTCCTTCCTTCCTT            | CTCCTTCCTTCCTT                                                                                                                    | RS=rs2033867895;Source=dbsnp |
| NC_000007.14 | 107976857 | rs1563000004 | CTTCCTTTCTCTTGCTCCTTCCTTCCTTTCT<br>CTCTCTCCTTCCTTCCTTTCTCTCCCTCCTTC<br>CTTCCTTTCTCTCCCTCCTTCCTTCCTT                                                                                                                  | CTCCTTCCTTCCTT                                                                                                                    | RS=rs1563000004;Source=dbsnp |
| NC_000007.14 | 107976857 | rs1563000000 | CTTCCTTTCTCTTGCTCCTTCCTTCCTTTCT<br>CTCTCTCCTTCCTTCCTTTCTCTCCCTCCTTC<br>CTTCCTTTCTCTCCCTCCTTCCTTCCTT                                                                                                                  | CTCCTTCCTTCCTT                                                                                                                    | RS=rs1563000000;Source=dbsnp |
| NC_000007.14 | 107976857 | rs1562999997 | CTCCTTCCTTCCTTCCTTTCTCTTGCTCCTTC<br>CTTCCTTTCTCTTGCTCCTTCCTTCCTT                                                                                                                                                     | CTCCTTCCTTCCTT                                                                                                                    | RS=rs1562999997;Source=dbsnp |
| NC_000007.14 | 107976857 | rs1562999993 | CTCCTTCCTTCCTTCCTTTCTCTTGCTCCTTC<br>CTTCCTT                                                                                                                                                                          | CTCCTTCCTTCCTT                                                                                                                    | RS=rs1562999993;Source=dbsnp |
| NC_000007.14 | 107976858 | rs200619058  | TCCTTCCTTCCTTCCTT                                                                                                                                                                                                    | TCCTTCCTT,TCCTTCCTTCCTT,TCCTTCCTTCC<br>TTCTTCCTT                                                                                  | RS=rs200619058;Source=dbsnp  |
| NC_000007.14 | 107976858 | rs28626050   | T                                                                                                                                                                                                                    | A,C                                                                                                                               | RS=rs28626050;Source=dbsnp   |
| NC_000007.14 | 107976859 | rs2033868173 | C                                                                                                                                                                                                                    | CT                                                                                                                                | RS=rs2033868173;Source=dbsnp |
| NC_000007.14 | 107976859 | rs1249203890 | C                                                                                                                                                                                                                    | T                                                                                                                                 | RS=rs1249203890;Source=dbsnp |
| NC_000007.14 | 107976860 | rs1210419500 | C                                                                                                                                                                                                                    | G,T                                                                                                                               | RS=rs1210419500;Source=dbsnp |
| NC_000007.14 | 107976861 | rs2033868486 | CTTCCTTCCTTCCTTTCTCTTGCTCCTTCCTT<br>CCTTTCTCTTGCTCCTTCCTTCCTTTCTCTC<br>TCTCCTTCCTTCCTTTCTCTCCCTCCTTCCTT<br>CCTTTCTCTCCCTCCTTCCTTCCTTTCTCTT<br>CCTCCTTCCTTCCTTTCTCTCT                                                 | C                                                                                                                                 | RS=rs2033868486;Source=dbsnp |
| NC_000007.14 | 107976861 | rs2033868435 | CCTTTCTCTTGCTCCTTCCTTCCTTTCTCTC<br>T                                                                                                                                                                                 | C                                                                                                                                 | RS=rs2033868435;Source=dbsnp |
| NC_000007.14 | 107976861 | rs2033868387 | CTTCCTTCCTTCCTTTCTCTTGCTCCTTCCTT<br>CCTTTCTCTTG                                                                                                                                                                      | C                                                                                                                                 | RS=rs2033868387;Source=dbsnp |
| NC_000007.14 | 107976861 | rs2033868337 | CTTCCTTCCTTCCTTTCTCTTG                                                                                                                                                                                               | C                                                                                                                                 | RS=rs2033868337;Source=dbsnp |
| NC_000007.14 | 107976861 | rs1263532744 | T                                                                                                                                                                                                                    | A,C                                                                                                                               | RS=rs1263532744;Source=dbsnp |
| NC_000007.14 | 107976862 | rs2033868810 | TCCTTCCTTCCTTTCTCTTGCTCCTTCCTTCC<br>TTTCTCTTGCTCCTTCCTTCCTTTCTCTCTC<br>TCCTTCCTTCCTTTCTCTCCCTCCTTCCTTCC<br>TTTCTCTCCCTCCTTCCTTTCTCTTCTTCC<br>TCCTTCCTTCCTTTCTCTCTCCTTCCTTCC<br>TTTCTCT                               | TCCTTCCTTCCTTTCTCT                                                                                                                | RS=rs2033868810;Source=dbsnp |
| NC_000007.14 | 107976862 | rs2033868754 | TCCTTCCTTCCTTTCTCTTGCTCCTTCCTTCC<br>TTTCTCTTGCTCCTTCCTTTCTCTCTCTC<br>TCCTTCCTTCCTTTCTCTCCCTCCTTCCTTCC<br>TTTCTCT                                                                                                     | TCCTTCCTTCCTTTCTCT                                                                                                                | RS=rs2033868754;Source=dbsnp |
| NC_000007.14 | 107976862 | rs1563000026 | TTTCTCTTGCTCCTTCCTTCCTTTCTCTCTC<br>TCCTTCCTTCCTTTCTCT                                                                                                                                                                | TCCTTCCTTCCTTTCTCT                                                                                                                | RS=rs1563000026;Source=dbsnp |
| NC_000007.14 | 107976862 | rs1563000018 | TCCTTCCTTCCTTTCTCTTGCTCCTTCCTTCC<br>TTTCTCTTGCTCCTTCCTTCCTTTCTCTCT<br>TTTCTCTTTCTCTTGCTCCTTCCTTCCTTT<br>CCTTTGCTCCTTCCTTTCTCT                                                                                        | TCCTTCCTTCCTTTCTCTTGCTCCTTCCTTCC<br>TTTCTCT,TCCTTCCTTCCTTTCTCTTGCTCC<br>TTTCTTCCTTTCTCTTGCTCCTTCCTTCCTTT<br>CCTTTGCTCCTTCCTTTCTCT | RS=rs1563000018;Source=dbsnp |
| NC_000007.14 | 107976862 | rs1554410192 | TCCTTCCTT                                                                                                                                                                                                            | TCCTTCCTTTCTCTCCCTCCTTCCTT,TCCTTC<br>CTTTCTCTCCCTCCTTCCTTTCTCTCTCC<br>CTCCTTCCTT,TCCTTCCTTTCTCTCCTTC<br>CTT                       | RS=rs1554410192;Source=dbsnp |
| NC_000007.14 | 107976863 | rs2033868856 | TCC                                                                                                                                                                                                                  | T                                                                                                                                 | RS=rs2033868856;Source=dbsnp |
| NC_000007.14 | 107976864 | rs2033868906 | C                                                                                                                                                                                                                    | G                                                                                                                                 | RS=rs2033868906;Source=dbsnp |
| NC_000007.14 | 107976866 | rs1245009649 | TCCTTCCT                                                                                                                                                                                                             | T                                                                                                                                 | RS=rs1245009649;Source=dbsnp |
| NC_000007.14 | 107976866 | rs2033868971 | TCCT                                                                                                                                                                                                                 | T                                                                                                                                 | RS=rs2033868971;Source=dbsnp |
| NC_000007.14 | 107976867 | rs2033869103 | TCC                                                                                                                                                                                                                  | T                                                                                                                                 | RS=rs2033869103;Source=dbsnp |
| NC_000007.14 | 107976867 | rs2033869055 | CC                                                                                                                                                                                                                   | C                                                                                                                                 | RS=rs2033869055;Source=dbsnp |
| NC_000007.14 | 107976868 | rs1354087520 | CTTCCTTTCC                                                                                                                                                                                                           | C                                                                                                                                 | RS=rs1354087520;Source=dbsnp |
| NC_000007.14 | 107976869 | rs1242584180 | TTCTTCCT                                                                                                                                                                                                             | TTCT                                                                                                                              | RS=rs1242584180;Source=dbsnp |
| NC_000007.14 | 107976869 | rs1334120593 | T                                                                                                                                                                                                                    | TC                                                                                                                                | RS=rs1334120593;Source=dbsnp |
| NC_000007.14 | 107976869 | rs573665348  | TT                                                                                                                                                                                                                   | TTT                                                                                                                               | RS=rs573665348;Source=dbsnp  |
| NC_000007.14 | 107976870 | rs2033869460 | TCCTTTCTCTTGCTCCTTCCTTCCTTTCTCT<br>TGCTCCTTCCTTCCTTTCTCTCTCCTTCCT<br>TCCT                                                                                                                                            | T                                                                                                                                 | RS=rs2033869460;Source=dbsnp |

|              |           |              |                                                                                                                                                                            |                                                                                                                                                    |                              |
|--------------|-----------|--------------|----------------------------------------------------------------------------------------------------------------------------------------------------------------------------|----------------------------------------------------------------------------------------------------------------------------------------------------|------------------------------|
| NC_000007.14 | 107976870 | rs2033869406 | TTCTTTCTCTTGCTCCTTCCTTTCTTCCTC<br>TTC                                                                                                                                      | T                                                                                                                                                  | RS=rs2033869406;Source=dbsnp |
| NC_000007.14 | 107976870 | rs2033869371 | TTC                                                                                                                                                                        | T                                                                                                                                                  | RS=rs2033869371;Source=dbsnp |
| NC_000007.14 | 107976871 | rs71134298   | CC                                                                                                                                                                         | CCC                                                                                                                                                | RS=rs71134298;Source=dbsnp   |
| NC_000007.14 | 107976871 | rs200947870  | C                                                                                                                                                                          | T                                                                                                                                                  | RS=rs200947870;Source=dbsnp  |
| NC_000007.14 | 107976872 | rs1393557364 | CTTTC                                                                                                                                                                      | C                                                                                                                                                  | RS=rs1393557364;Source=dbsnp |
| NC_000007.14 | 107976872 | rs1301785430 | C                                                                                                                                                                          | T                                                                                                                                                  | RS=rs1301785430;Source=dbsnp |
| NC_000007.14 | 107976873 | rs1424483961 | CTTTCCTTTG                                                                                                                                                                 | C                                                                                                                                                  | RS=rs1424483961;Source=dbsnp |
| NC_000007.14 | 107976873 | rs1170193219 | T                                                                                                                                                                          | A,C                                                                                                                                                | RS=rs1170193219;Source=dbsnp |
| NC_000007.14 | 107976874 | rs2033869902 | T                                                                                                                                                                          | TC                                                                                                                                                 | RS=rs2033869902;Source=dbsnp |
| NC_000007.14 | 107976874 | rs1369041438 | T                                                                                                                                                                          | C                                                                                                                                                  | RS=rs1369041438;Source=dbsnp |
| NC_000007.14 | 107976875 | rs2033869953 | TTCTCTTGCTCCTTCCTTTCTTCCTTTGCT<br>CCTTCCTC                                                                                                                                 | T                                                                                                                                                  | RS=rs2033869953;Source=dbsnp |
| NC_000007.14 | 107976878 | rs1381280311 | CTCTTG                                                                                                                                                                     | C                                                                                                                                                  | RS=rs1381280311;Source=dbsnp |
| NC_000007.14 | 107976879 | rs1482229543 | CTTGCT                                                                                                                                                                     | CT                                                                                                                                                 | RS=rs1482229543;Source=dbsnp |
| NC_000007.14 | 107976879 | rs1563000050 | TCTTGC                                                                                                                                                                     | T                                                                                                                                                  | RS=rs1563000050;Source=dbsnp |
| NC_000007.14 | 107976881 | rs2033870291 | TGCT                                                                                                                                                                       | T                                                                                                                                                  | RS=rs2033870291;Source=dbsnp |
| NC_000007.14 | 107976881 | rs1563000058 | TTG                                                                                                                                                                        | T                                                                                                                                                  | RS=rs1563000058;Source=dbsnp |
| NC_000007.14 | 107976881 | rs12705425   | T                                                                                                                                                                          | C                                                                                                                                                  | RS=rs12705425;Source=dbsnp   |
| NC_000007.14 | 107976882 | rs2033870479 | TGCTCCTTCCTTTCTTCCTTTGCTCCTTCCT<br>TCCTTTCTCTCTCCTTCCTTCCTTTCTCT<br>C                                                                                                      | T                                                                                                                                                  | RS=rs2033870479;Source=dbsnp |
| NC_000007.14 | 107976882 | rs1563000061 | TG                                                                                                                                                                         | T                                                                                                                                                  | RS=rs1563000061;Source=dbsnp |
| NC_000007.14 | 107976882 | rs12705426   | G                                                                                                                                                                          | A,C,T                                                                                                                                              | RS=rs12705426;Source=dbsnp   |
| NC_000007.14 | 107976883 | rs2033870598 | C                                                                                                                                                                          | CCT                                                                                                                                                | RS=rs2033870598;Source=dbsnp |
| NC_000007.14 | 107976883 | rs1198953602 | C                                                                                                                                                                          | A,T                                                                                                                                                | RS=rs1198953602;Source=dbsnp |
| NC_000007.14 | 107976884 | rs1269738539 | CTCCTTCCTTCCTTTCTTCCTTTGCTCCTTCCTTC<br>CTTTCTCTCT                                                                                                                          | C                                                                                                                                                  | RS=rs1269738539;Source=dbsnp |
| NC_000007.14 | 107976884 | rs1265207700 | TCCTTCCTTCCTT                                                                                                                                                              | TCCTTCCTT                                                                                                                                          | RS=rs1265207700;Source=dbsnp |
| NC_000007.14 | 107976884 | rs2033870642 | T                                                                                                                                                                          | C                                                                                                                                                  | RS=rs2033870642;Source=dbsnp |
| NC_000007.14 | 107976886 | rs1221619597 | C                                                                                                                                                                          | T                                                                                                                                                  | RS=rs1221619597;Source=dbsnp |
| NC_000007.14 | 107976887 | rs2033870975 | CTTCCTTCCTTTCTTCCTTTGCTCCTTCCTTCCTT<br>TCCTCTCT                                                                                                                            | C                                                                                                                                                  | RS=rs2033870975;Source=dbsnp |
| NC_000007.14 | 107976887 | rs2033870922 | CTTCCTTCCTTTCTTCCTT                                                                                                                                                        | C                                                                                                                                                  | RS=rs2033870922;Source=dbsnp |
| NC_000007.14 | 107976887 | rs146118265  | T                                                                                                                                                                          | A,C,G                                                                                                                                              | RS=rs146118265;Source=dbsnp  |
| NC_000007.14 | 107976891 | rs2033871024 | TTCCTTTCT                                                                                                                                                                  | TTCCT                                                                                                                                              | RS=rs2033871024;Source=dbsnp |
| NC_000007.14 | 107976893 | rs1348820194 | C                                                                                                                                                                          | T                                                                                                                                                  | RS=rs1348820194;Source=dbsnp |
| NC_000007.14 | 107976894 | rs2033871118 | CTTTC                                                                                                                                                                      | C                                                                                                                                                  | RS=rs2033871118;Source=dbsnp |
| NC_000007.14 | 107976896 | rs1279145937 | T                                                                                                                                                                          | C                                                                                                                                                  | RS=rs1279145937;Source=dbsnp |
| NC_000007.14 | 107976897 | rs2033871224 | T                                                                                                                                                                          | C                                                                                                                                                  | RS=rs2033871224;Source=dbsnp |
| NC_000007.14 | 107976900 | rs2033871321 | CTCTTG                                                                                                                                                                     | C                                                                                                                                                  | RS=rs2033871321;Source=dbsnp |
| NC_000007.14 | 107976900 | rs2033871280 | T                                                                                                                                                                          | A                                                                                                                                                  | RS=rs2033871280;Source=dbsnp |
| NC_000007.14 | 107976901 | rs2033871373 | CTTGCT                                                                                                                                                                     | CT                                                                                                                                                 | RS=rs2033871373;Source=dbsnp |
| NC_000007.14 | 107976903 | rs2033871564 | TGCT                                                                                                                                                                       | T                                                                                                                                                  | RS=rs2033871564;Source=dbsnp |
| NC_000007.14 | 107976903 | rs1234085246 | TTG                                                                                                                                                                        | T                                                                                                                                                  | RS=rs1234085246;Source=dbsnp |
| NC_000007.14 | 107976903 | rs12705427   | T                                                                                                                                                                          | A,C                                                                                                                                                | RS=rs12705427;Source=dbsnp   |
| NC_000007.14 | 107976904 | rs12705428   | G                                                                                                                                                                          | A,C,T                                                                                                                                              | RS=rs12705428;Source=dbsnp   |
| NC_000007.14 | 107976905 | rs2033871845 | CTCCTTCCTTCCTTTCTCTCTCCTTCCTTC<br>CTTTCTCTCCCTCCTTCCTTTCTCTCC<br>CTCCTTCCTTCCTTTCTCTCCCTTCCTTC<br>CTTTCTCTCTCTCCTTCCTTTCTCTCC<br>CTCCTTCCTTCCTTTCTCTCCCTTCCTTC<br>CTTTCTCT | CTCCTTCCTTCCTTTCTCTCTCCTTCCTTC<br>CTTTCTCTCCCTCCTTCCTTTCTCTCC<br>CTCCTTCCTTCCTTTCTCTCCCTTCCTTC<br>CTTTCTCTCT                                       | RS=rs2033871845;Source=dbsnp |
| NC_000007.14 | 107976905 | rs2033871778 | CTTTCTCTCCCTCCTTCCTTTCTCTCC<br>CTCCTTCCTTCCTTTCTCT                                                                                                                         | CTCCTTCCTTCCTTTCTCT                                                                                                                                | RS=rs2033871778;Source=dbsnp |
| NC_000007.14 | 107976905 | rs1554410224 | C                                                                                                                                                                          | CCTTCCTTCCTTTGCTCCTTCCTTCCTTTCTTC<br>CTC                                                                                                           | RS=rs1554410224;Source=dbsnp |
| NC_000007.14 | 107976906 | rs1399252403 | T                                                                                                                                                                          | C                                                                                                                                                  | RS=rs1399252403;Source=dbsnp |
| NC_000007.14 | 107976906 | rs2033871938 | T                                                                                                                                                                          | TT                                                                                                                                                 | RS=rs2033871938;Source=dbsnp |
| NC_000007.14 | 107976908 | rs2033871985 | CTTC                                                                                                                                                                       | CTTCTTC                                                                                                                                            | RS=rs2033871985;Source=dbsnp |
| NC_000007.14 | 107976915 | rs1255193256 | C                                                                                                                                                                          | T                                                                                                                                                  | RS=rs1255193256;Source=dbsnp |
| NC_000007.14 | 107976918 | rs2033872078 | TTCT                                                                                                                                                                       | T                                                                                                                                                  | RS=rs2033872078;Source=dbsnp |
| NC_000007.14 | 107976921 | rs373553620  | CTCTCTCTC                                                                                                                                                                  | CTCTC,CTCTCTC                                                                                                                                      | RS=rs373553620;Source=dbsnp  |
| NC_000007.14 | 107976921 | rs2033872139 | C                                                                                                                                                                          | T                                                                                                                                                  | RS=rs2033872139;Source=dbsnp |
| NC_000007.14 | 107976924 | rs2033872359 | TCTCTCCTTC                                                                                                                                                                 | TC                                                                                                                                                 | RS=rs2033872359;Source=dbsnp |
| NC_000007.14 | 107976924 | rs1278022076 | T                                                                                                                                                                          | TTCTCTCCTTCCTTTCTCTCTCCTTCCT<br>TCCTTC                                                                                                             | RS=rs1278022076;Source=dbsnp |
| NC_000007.14 | 107976924 | rs1478751142 | T                                                                                                                                                                          | C                                                                                                                                                  | RS=rs1478751142;Source=dbsnp |
| NC_000007.14 | 107976924 | rs34858020   | T                                                                                                                                                                          | TT                                                                                                                                                 | RS=rs34858020;Source=dbsnp   |
| NC_000007.14 | 107976925 | rs2033872682 | CTCTCCTTCCTTTCTCTCCTTCCTTCCT<br>TCCTTTCTCTCCCTCCTTCCTTTCTCT                                                                                                                | CTCTCCTTCCTTTCTCTCCTTCCTTCCT<br>TCCTTTCTCTCCCTCCTTCCTTTCTCT<br>CCCTCCTTCCTTTCTCTCCTTCCTTCCT<br>TTCTCTCCCTCCTTCCTTTCTCTCCTTCCT<br>CCTTCCTTCCTTTCTCT | RS=rs2033872682;Source=dbsnp |
| NC_000007.14 | 107976925 | rs2033872636 | TCTC                                                                                                                                                                       | T                                                                                                                                                  | RS=rs2033872636;Source=dbsnp |
| NC_000007.14 | 107976925 | rs71528127   | CT                                                                                                                                                                         | TG                                                                                                                                                 | RS=rs71528127;Source=dbsnp   |
| NC_000007.14 | 107976925 | rs1563000104 | C                                                                                                                                                                          | CC,CCC                                                                                                                                             | RS=rs1563000104;Source=dbsnp |
| NC_000007.14 | 107976925 | rs13228658   | C                                                                                                                                                                          | T                                                                                                                                                  | RS=rs13228658;Source=dbsnp   |
| NC_000007.14 | 107976926 | rs2033872878 | CTCT                                                                                                                                                                       | C                                                                                                                                                  | RS=rs2033872878;Source=dbsnp |

|              |           |              |                                                                                                                           |                                                                                                                                                                                                                                                                                                                                                                                                                      |                              |
|--------------|-----------|--------------|---------------------------------------------------------------------------------------------------------------------------|----------------------------------------------------------------------------------------------------------------------------------------------------------------------------------------------------------------------------------------------------------------------------------------------------------------------------------------------------------------------------------------------------------------------|------------------------------|
| NC_000007.14 | 107976926 | rs1484751819 | T                                                                                                                         | TTCTTCCTTTCTCTCCCTCCTTCCTTCCTTT<br>CCTCTCC                                                                                                                                                                                                                                                                                                                                                                           | RS=rs1484751819;Source=dbsnp |
| NC_000007.14 | 107976926 | rs371463138  | CT                                                                                                                        | C                                                                                                                                                                                                                                                                                                                                                                                                                    | RS=rs371463138;Source=dbsnp  |
| NC_000007.14 | 107976926 | rs13243022   | T                                                                                                                         | C,G                                                                                                                                                                                                                                                                                                                                                                                                                  | RS=rs13243022;Source=dbsnp   |
| NC_000007.14 | 107976927 | rs2033873314 | CTTCCTCTCCCTCCTTCCTTCCTTTCTCTTC<br>CTCCTTCCTTCCTTCCTCTC                                                                   | CTCCTTCCTTCCTTCCTCTC                                                                                                                                                                                                                                                                                                                                                                                                 | RS=rs2033873314;Source=dbsnp |
| NC_000007.14 | 107976927 | rs1563000135 | CTCCTTCCTTCCTTTCTCTCCCTCCTTCCTTC<br>CTTTCTCTCCCTCCTTCCTTCCTTTCTCT                                                         | CTCCTTCCTTCCTTCCTTCCTTCCTTC<br>CTTTCTCT,CTCCTTCCTTCCTTCCTTCCTTCCT<br>CCTTCCTTCCTTCCTTCCTTCCTTCCTTCCT<br>TTCTCTCCCTCCTTCCTTCCTTCCTCT,CTCC<br>TTCTTCCTTCCTTCCTTCCTTCCTTCCTTCCTTT<br>CCTTCCTTCCTTCCTTCCTTCCTTCCTTCCTTC<br>TTCTTCCTTCCTTCCTTCCTTCCTTCCTTCCTTT<br>CCTTCCTTCCTTCCTTCCTTCCTTCCTTCCTTC<br>CCTTCCTTCCTTCCTTCCTTCCTTCCTTCCTTC<br>TCTCGCTTCCTTCCTTCCTTCCTTCCTTCCTTC<br>CCTTCCTTCCTTCCTTCCTTCCTTCCTTCCTTC<br>TCT | RS=rs1563000135;Source=dbsnp |
| NC_000007.14 | 107976927 | rs1563000132 | CTCCTTCCTTCCTTTCTCTCCCTCCTTCCTTC<br>CTTTCTCTC                                                                             | CTCCTTCCTTCCTTCCTTCCTTCCTTC<br>CTTTCTCTCGCTTCCTTCCTTCCTTCCTTCCTTC<br>CTCCTTCCTTCCTTCCTTCCTTCCTTCCTTCCTTC                                                                                                                                                                                                                                                                                                             | RS=rs1563000132;Source=dbsnp |
| NC_000007.14 | 107976927 | rs2033873105 | CTCCT                                                                                                                     | CT                                                                                                                                                                                                                                                                                                                                                                                                                   | RS=rs2033873105;Source=dbsnp |
| NC_000007.14 | 107976927 | rs2033873063 | CT                                                                                                                        | CTTCTTCCTTCCTTCCTTCCTTCCTTCCTTC<br>CTTTCTCTCCCT                                                                                                                                                                                                                                                                                                                                                                      | RS=rs2033873063;Source=dbsnp |
| NC_000007.14 | 107976927 | rs1554410235 | C                                                                                                                         | CC,CCTCCTTCCTTCCTTCCTTCCTTCCTTC<br>TCCTTCCTTCCTTCCTTCCTTCCTTCCTTCCTTC                                                                                                                                                                                                                                                                                                                                                | RS=rs1554410235;Source=dbsnp |
| NC_000007.14 | 107976928 | rs2033873358 | TCCTTCCTTCCTT                                                                                                             | TCCTTCCTTCCTTCCTTCCTTCCTTCCTTCCTTC                                                                                                                                                                                                                                                                                                                                                                                   | RS=rs2033873358;Source=dbsnp |
| NC_000007.14 | 107976929 | rs1265167309 | C                                                                                                                         | T                                                                                                                                                                                                                                                                                                                                                                                                                    | RS=rs1265167309;Source=dbsnp |
| NC_000007.14 | 107976931 | rs2033873461 | T                                                                                                                         | C                                                                                                                                                                                                                                                                                                                                                                                                                    | RS=rs2033873461;Source=dbsnp |
| NC_000007.14 | 107976935 | rs1168427516 | TTCTTCCTTCCT                                                                                                              | TTCTTCCTTCCTTCCTTCCTTCCTTCCTTCCTTC                                                                                                                                                                                                                                                                                                                                                                                   | RS=rs1168427516;Source=dbsnp |
| NC_000007.14 | 107976937 | rs1446163122 | C                                                                                                                         | T                                                                                                                                                                                                                                                                                                                                                                                                                    | RS=rs1446163122;Source=dbsnp |
| NC_000007.14 | 107976938 | rs1283886826 | C                                                                                                                         | T                                                                                                                                                                                                                                                                                                                                                                                                                    | RS=rs1283886826;Source=dbsnp |
| NC_000007.14 | 107976939 | rs2033873640 | TTT                                                                                                                       | TT                                                                                                                                                                                                                                                                                                                                                                                                                   | RS=rs2033873640;Source=dbsnp |
| NC_000007.14 | 107976944 | rs113307657  | T                                                                                                                         | C                                                                                                                                                                                                                                                                                                                                                                                                                    | RS=rs113307657;Source=dbsnp  |
| NC_000007.14 | 107976945 | rs138090891  | CTCCCTCC                                                                                                                  | CTCC                                                                                                                                                                                                                                                                                                                                                                                                                 | RS=rs138090891;Source=dbsnp  |
| NC_000007.14 | 107976947 | rs2033873851 | CCC                                                                                                                       | CCCCC                                                                                                                                                                                                                                                                                                                                                                                                                | RS=rs2033873851;Source=dbsnp |
| NC_000007.14 | 107976947 | rs2033873793 | C                                                                                                                         | T                                                                                                                                                                                                                                                                                                                                                                                                                    | RS=rs2033873793;Source=dbsnp |
| NC_000007.14 | 107976948 | rs2033873972 | CCTCCT                                                                                                                    | CCT                                                                                                                                                                                                                                                                                                                                                                                                                  | RS=rs2033873972;Source=dbsnp |
| NC_000007.14 | 107976948 | rs71540989   | C                                                                                                                         | G,T                                                                                                                                                                                                                                                                                                                                                                                                                  | RS=rs71540989;Source=dbsnp   |
| NC_000007.14 | 107976949 | rs2033874212 | CTCCTTCCTTCCTTCCTTCCTTCCTTCCTTC<br>CTTTCTCTTCCTTCCTTCCTTCCTTCCTTCCTTC<br>CTCCTTCCTTCCTTCCTTCCTTCCTTCCTTCCTTC<br>CTTTCTCTC | CTCCTTCCTTCCTTCCTTCCTTCCTTCCTTCCTTC<br>CTTTCTCTTCCTTCCTTCCTTCCTTCCTTCCTTC<br>TTCTTCCTTCCTTCCTTCCTTCCTTCCTTCCTTC                                                                                                                                                                                                                                                                                                      | RS=rs2033874212;Source=dbsnp |
| NC_000007.14 | 107976949 | rs71134299   | CTCCTTCCTTCCTTCCTTCCTTCCTTCCTTC<br>CTTTCC                                                                                 | CTCCTTCCTTCCTTCCTTCCTTCCTTCCTTCCTTC<br>CTTTCCACTCCTTCCTTCCTTCCTTCCTTCCTTC<br>TTCTTCCTTCCTTCCTTCCTTCCTTCCTTCCTTC                                                                                                                                                                                                                                                                                                      | RS=rs71134299;Source=dbsnp   |
| NC_000007.14 | 107976949 | rs1554410239 | CTCCTTCCTTCCTTCCTTCCTTCCTTCCTTC                                                                                           | CTCCTTCCTTCCTTCCTTCCTTCCTTCCTTCCTTC<br>TTTCTTCCTTCCTTCCTTCCTTCCTTCCTTCCTTC<br>TCCTTCCTTCCTTCCTTCCTTCCTTCCTTCCTTC<br>CC                                                                                                                                                                                                                                                                                               | RS=rs1554410239;Source=dbsnp |
| NC_000007.14 | 107976949 | rs13228744   | C                                                                                                                         | T                                                                                                                                                                                                                                                                                                                                                                                                                    | RS=rs13228744;Source=dbsnp   |
| NC_000007.14 | 107976950 | rs2033874266 | TCCTTCCTTCCTT                                                                                                             | TCCTTCCTTCCTTCCTTCCTTCCTTCCTTCCTTC                                                                                                                                                                                                                                                                                                                                                                                   | RS=rs2033874266;Source=dbsnp |
| NC_000007.14 | 107976953 | rs923672098  | T                                                                                                                         | C                                                                                                                                                                                                                                                                                                                                                                                                                    | RS=rs923672098;Source=dbsnp  |
| NC_000007.14 | 107976954 | rs1584524006 | T                                                                                                                         | C                                                                                                                                                                                                                                                                                                                                                                                                                    | RS=rs1584524006;Source=dbsnp |
| NC_000007.14 | 107976957 | rs1427480900 | TTCTTCCTTCCT                                                                                                              | TTCTTCCTTCCTTCCTTCCTTCCTTCCTTCCTTC                                                                                                                                                                                                                                                                                                                                                                                   | RS=rs1427480900;Source=dbsnp |
| NC_000007.14 | 107976957 | rs2033874426 | TT                                                                                                                        | T                                                                                                                                                                                                                                                                                                                                                                                                                    | RS=rs2033874426;Source=dbsnp |
| NC_000007.14 | 107976959 | rs2033874539 | C                                                                                                                         | T                                                                                                                                                                                                                                                                                                                                                                                                                    | RS=rs2033874539;Source=dbsnp |
| NC_000007.14 | 107976960 | rs2033874593 | CTTTC                                                                                                                     | C                                                                                                                                                                                                                                                                                                                                                                                                                    | RS=rs2033874593;Source=dbsnp |
| NC_000007.14 | 107976961 | rs2033874701 | TTT                                                                                                                       | TT                                                                                                                                                                                                                                                                                                                                                                                                                   | RS=rs2033874701;Source=dbsnp |
| NC_000007.14 | 107976961 | rs2033874648 | T                                                                                                                         | C                                                                                                                                                                                                                                                                                                                                                                                                                    | RS=rs2033874648;Source=dbsnp |
| NC_000007.14 | 107976967 | rs1341685589 | CTCCCTCC                                                                                                                  | CTCC                                                                                                                                                                                                                                                                                                                                                                                                                 | RS=rs1341685589;Source=dbsnp |
| NC_000007.14 | 107976969 | rs2033874848 | CCC                                                                                                                       | C                                                                                                                                                                                                                                                                                                                                                                                                                    | RS=rs2033874848;Source=dbsnp |
| NC_000007.14 | 107976969 | rs1280600522 | C                                                                                                                         | T                                                                                                                                                                                                                                                                                                                                                                                                                    | RS=rs1280600522;Source=dbsnp |
| NC_000007.14 | 107976970 | rs2033875126 | CCTCCTTCCTTCCTTCCTTCCTTCCTTCCTTC<br>CCTTCCTTCCTTCCTTCCTTCCTTCCTTCCTTC                                                     | CCTCCTTCCTTCCTTCCTTCCTTCCTTCCTTCCTTC<br>CTTTCTCTTCCTTCCTTCCTTCCTTCCTTCCTTC<br>CTCCTTCCTTCCTTCCTTCCTTCCTTCCTTCCTTC                                                                                                                                                                                                                                                                                                    | RS=rs2033875126;Source=dbsnp |
| NC_000007.14 | 107976970 | rs2033875044 | CCTCCTTCCTTCCTTCCTTCCTTCCTTCCTTC<br>CCTTCCTTCCTTCCTTCCTTCCTTCCTTCCTTC                                                     | CCTCCTTCCTTCCTTCCTTCCTTCCTTCCTTCCTTC<br>CTTTCTCTTCCTTCCTTCCTTCCTTCCTTCCTTC<br>CTCCTTCCTTCCTTCCTTCCTTCCTTCCTTCCTTC                                                                                                                                                                                                                                                                                                    | RS=rs2033875044;Source=dbsnp |
| NC_000007.14 | 107976970 | rs1429085421 | CCTCCT                                                                                                                    | CCT                                                                                                                                                                                                                                                                                                                                                                                                                  | RS=rs1429085421;Source=dbsnp |
| NC_000007.14 | 107976970 | rs1326185955 | C                                                                                                                         | G,T                                                                                                                                                                                                                                                                                                                                                                                                                  | RS=rs1326185955;Source=dbsnp |
| NC_000007.14 | 107976971 | rs1584524026 | CTCCTTCCTTCCTTCCTTCCTTCCTTCCTTC<br>CTTTCTCTCTCTCCTTCCTTCCTTCCTTCCTTC                                                      | CTCCTTCCTTCCTTCCTTCCTTCCTTCCTTCCTTC                                                                                                                                                                                                                                                                                                                                                                                  | RS=rs1584524026;Source=dbsnp |
| NC_000007.14 | 107976971 | rs2033875180 | C                                                                                                                         | T                                                                                                                                                                                                                                                                                                                                                                                                                    | RS=rs2033875180;Source=dbsnp |
| NC_000007.14 | 107976972 | rs2033875397 | TCCTTCCTTCCTT                                                                                                             | TCCTTCCTTCCTTCCTTCCTTCCTTCCTTCCTTC                                                                                                                                                                                                                                                                                                                                                                                   | RS=rs2033875397;Source=dbsnp |
| NC_000007.14 | 107976972 | rs2033875294 | T                                                                                                                         | A                                                                                                                                                                                                                                                                                                                                                                                                                    | RS=rs2033875294;Source=dbsnp |
| NC_000007.14 | 107976972 | rs1415810707 | T                                                                                                                         | TT                                                                                                                                                                                                                                                                                                                                                                                                                   | RS=rs1415810707;Source=dbsnp |
| NC_000007.14 | 107976973 | rs1403375462 | CC                                                                                                                        | CCCC                                                                                                                                                                                                                                                                                                                                                                                                                 | RS=rs1403375462;Source=dbsnp |
| NC_000007.14 | 107976975 | rs867916253  | T                                                                                                                         | G                                                                                                                                                                                                                                                                                                                                                                                                                    | RS=rs867916253;Source=dbsnp  |
| NC_000007.14 | 107976979 | rs2033875560 | TTCTTCCTTCCT                                                                                                              | TTCTTCCTTCCTTCCTTCCTTCCTTCCTTCCTTC                                                                                                                                                                                                                                                                                                                                                                                   | RS=rs2033875560;Source=dbsnp |
| NC_000007.14 | 107976982 | rs1465657426 | CTTTC                                                                                                                     | C                                                                                                                                                                                                                                                                                                                                                                                                                    | RS=rs1465657426;Source=dbsnp |



|              |           |              |                                                |                                                                                                                                                                                                                                           |                              |
|--------------|-----------|--------------|------------------------------------------------|-------------------------------------------------------------------------------------------------------------------------------------------------------------------------------------------------------------------------------------------|------------------------------|
| NC_000007.14 | 107977036 | rs112048516  | C                                              | G,T                                                                                                                                                                                                                                       | RS=rs112048516;Source=dbsnp  |
| NC_000007.14 | 107977037 | rs2033879294 | CTCCTTCCTTCCTTTCTCTCCCTCCTTCCTTC<br>CTTTCTCCTC | CTCCTTCCTTCCTTTCTCTCCCTCCTTCCTTC<br>CTTTCTCCTTCCTTCCTTTCTCTCCCTCC<br>TTCTTCCTTTCTCTC                                                                                                                                                      | RS=rs2033879294;Source=dbsnp |
| NC_000007.14 | 107977037 | rs2033879229 | CTCCTTCCTTCCTTTCTCTC                           | CTCCTTCCTTCCTTTCTCTCTCTCCTTCCTTC<br>CTTTCTCCTC                                                                                                                                                                                            | RS=rs2033879229;Source=dbsnp |
| NC_000007.14 | 107977037 | rs867270904  | C                                              | T                                                                                                                                                                                                                                         | RS=rs867270904;Source=dbsnp  |
| NC_000007.14 | 107977038 | rs2033879387 | TCCTTCCTTCCTT                                  | TCCTTCCTT                                                                                                                                                                                                                                 | RS=rs2033879387;Source=dbsnp |
| NC_000007.14 | 107977038 | rs2033879345 | T                                              | TT                                                                                                                                                                                                                                        | RS=rs2033879345;Source=dbsnp |
| NC_000007.14 | 107977041 | rs1056403312 | T                                              | C,G                                                                                                                                                                                                                                       | RS=rs1056403312;Source=dbsnp |
| NC_000007.14 | 107977044 | rs1234666553 | C                                              | T                                                                                                                                                                                                                                         | RS=rs1234666553;Source=dbsnp |
| NC_000007.14 | 107977045 | rs1202459028 | TTCCTTTCTC                                     | TTCCT                                                                                                                                                                                                                                     | RS=rs1202459028;Source=dbsnp |
| NC_000007.14 | 107977048 | rs2033879591 | CTTTC                                          | C                                                                                                                                                                                                                                         | RS=rs2033879591;Source=dbsnp |
| NC_000007.14 | 107977050 | rs2033879644 | TTCCT                                          | T                                                                                                                                                                                                                                         | RS=rs2033879644;Source=dbsnp |
| NC_000007.14 | 107977051 | rs1437766312 | TCCTCTCC                                       | TCC                                                                                                                                                                                                                                       | RS=rs1437766312;Source=dbsnp |
| NC_000007.14 | 107977052 | rs2033879746 | C                                              | G,T                                                                                                                                                                                                                                       | RS=rs2033879746;Source=dbsnp |
| NC_000007.14 | 107977053 | rs2033879811 | C                                              | A                                                                                                                                                                                                                                         | RS=rs2033879811;Source=dbsnp |
| NC_000007.14 | 107977054 | rs2033879858 | TCTCCCTCCTTCCTTCCTT                            | TCTCCCTCCTTCCTTCCTTCTCCCTCCTTCCTT<br>CCTT                                                                                                                                                                                                 | RS=rs2033879858;Source=dbsnp |
| NC_000007.14 | 107977055 | rs1458110777 | CTCCCTCC                                       | CTCC                                                                                                                                                                                                                                      | RS=rs1458110777;Source=dbsnp |
| NC_000007.14 | 107977057 | rs2033880023 | CCCTCCTTCCTTTCTCTCTCTCCTTCCTT<br>TCCTTCCTCCCC  | CC                                                                                                                                                                                                                                        | RS=rs2033880023;Source=dbsnp |
| NC_000007.14 | 107977057 | rs1047709192 | C                                              | T                                                                                                                                                                                                                                         | RS=rs1047709192;Source=dbsnp |
| NC_000007.14 | 107977058 | rs2033880148 | CCTCCT                                         | CCT                                                                                                                                                                                                                                       | RS=rs2033880148;Source=dbsnp |
| NC_000007.14 | 107977058 | rs377128832  | C                                              | G,T                                                                                                                                                                                                                                       | RS=rs377128832;Source=dbsnp  |
| NC_000007.14 | 107977059 | rs2033880277 | CTCCTTCCTTCCTTTCTCTCTCCTTCCTTC<br>CTTTCTCCTC   | CTCCTTCCTTCCTTTCTCTC,CTCCTTCCTTCCTT<br>TCCTCTCTCCTTCCTTCCTTTCTCTCTCTC<br>CTTCCTTCCTTTCTC                                                                                                                                                  | RS=rs2033880277;Source=dbsnp |
| NC_000007.14 | 107977059 | rs2033880192 | CTCCTTCCTTCCTTTCTCTC                           | CTCCTTCCTTCCTTTCTCTCCCTCCTTCCTTC<br>CTTTCTCTCCCTCCTTCCTTCCTTTCTCTCTC<br>CTCCTTCCTTCCTTTCTCTC,CTCCTTCCTTCCTTC<br>TTCTCTCCTTCCTTCCTTCCTTTCTCTCTCCT<br>TCCTTCCTTTCTCTC,CTCCTTCCTTCCTTTCC<br>TCTCCCTCCTTCCTTCCTTTCTCTCTCCTT<br>CCTTCCTTTCTCTC | RS=rs2033880192;Source=dbsnp |
| NC_000007.14 | 107977060 | rs2033880399 | TCCTTCCTTCCTTTCTCTC                            | TCCTTCCTTCCTTTCTCTCCCTCCTTCCTTC<br>TTCTCTCCTTCCTTCCTTCCTTTCTCTC                                                                                                                                                                           | RS=rs2033880399;Source=dbsnp |
| NC_000007.14 | 107977060 | rs2033880350 | TCCTTCCTTCCTT                                  | TCCTTCCTT                                                                                                                                                                                                                                 | RS=rs2033880350;Source=dbsnp |
| NC_000007.14 | 107977061 | rs2033880452 | C                                              | G                                                                                                                                                                                                                                         | RS=rs2033880452;Source=dbsnp |
| NC_000007.14 | 107977062 | rs2033880500 | C                                              | T                                                                                                                                                                                                                                         | RS=rs2033880500;Source=dbsnp |
| NC_000007.14 | 107977064 | rs1357713570 | T                                              | G                                                                                                                                                                                                                                         | RS=rs1357713570;Source=dbsnp |
| NC_000007.14 | 107977067 | rs2033880631 | TTCCTTTCTC                                     | TTCCT                                                                                                                                                                                                                                     | RS=rs2033880631;Source=dbsnp |
| NC_000007.14 | 107977067 | rs1006402155 | T                                              | C                                                                                                                                                                                                                                         | RS=rs1006402155;Source=dbsnp |
| NC_000007.14 | 107977069 | rs1313977902 | C                                              | T                                                                                                                                                                                                                                         | RS=rs1313977902;Source=dbsnp |
| NC_000007.14 | 107977072 | rs2033880739 | TTCCTCTCTCCTTCCTTCCTTTCTCCCTT<br>CCCTTCCTC     | TTCTCTC                                                                                                                                                                                                                                   | RS=rs2033880739;Source=dbsnp |
| NC_000007.14 | 107977073 | rs2033880778 | T                                              | C                                                                                                                                                                                                                                         | RS=rs2033880778;Source=dbsnp |
| NC_000007.14 | 107977074 | rs1248395322 | C                                              | T                                                                                                                                                                                                                                         | RS=rs1248395322;Source=dbsnp |
| NC_000007.14 | 107977075 | rs1378550737 | CTCTCTCTC                                      | CTCTC,CTCTCTC                                                                                                                                                                                                                             | RS=rs1378550737;Source=dbsnp |
| NC_000007.14 | 107977078 | rs1295957491 | T                                              | C                                                                                                                                                                                                                                         | RS=rs1295957491;Source=dbsnp |
| NC_000007.14 | 107977079 | rs1440744052 | C                                              | CCT                                                                                                                                                                                                                                       | RS=rs1440744052;Source=dbsnp |
| NC_000007.14 | 107977079 | rs2033881056 | C                                              | CCC,CCCTCCTTCCTTCCTTTCC                                                                                                                                                                                                                   | RS=rs2033881056;Source=dbsnp |
| NC_000007.14 | 107977079 | rs1350429134 | C                                              | T                                                                                                                                                                                                                                         | RS=rs1350429134;Source=dbsnp |
| NC_000007.14 | 107977080 | rs1292805547 | CTCT                                           | C                                                                                                                                                                                                                                         | RS=rs1292805547;Source=dbsnp |
| NC_000007.14 | 107977080 | rs77048898   | T                                              | A,C,G                                                                                                                                                                                                                                     | RS=rs77048898;Source=dbsnp   |
| NC_000007.14 | 107977080 | rs1554410284 | T                                              | CTTCCTTCCTTTCTCTCC                                                                                                                                                                                                                        | RS=rs1554410284;Source=dbsnp |
| NC_000007.14 | 107977081 | rs2033881499 | CTCCTTCCTTCCTTTCTCTC                           | CTCCTTCCTTCCTTTCTCTCCCTCCTTCCTTC<br>CTTTCTCCTC                                                                                                                                                                                            | RS=rs2033881499;Source=dbsnp |
| NC_000007.14 | 107977081 | rs1422564457 | CTCCT                                          | CT                                                                                                                                                                                                                                        | RS=rs1422564457;Source=dbsnp |
| NC_000007.14 | 107977081 | rs2033881349 | C                                              | CCTTCCTTCCTTTCTCTCCTTCCTTCCTTCCT<br>TTCTCTCCC,CCTTCCTTCCTTTCTCTCCCTC<br>CTTCCTTCCTTTCTCTCC,CCTTCCTTCCTTT<br>CCTCTCCTTCCTTTCTCTCCC,CCTTCCT<br>TCCTTTCTCTTC                                                                                 | RS=rs2033881349;Source=dbsnp |
| NC_000007.14 | 107977082 | rs1384342894 | CT                                             | C                                                                                                                                                                                                                                         | RS=rs1384342894;Source=dbsnp |
| NC_000007.14 | 107977084 | rs1163250762 | C                                              | T                                                                                                                                                                                                                                         | RS=rs1163250762;Source=dbsnp |
| NC_000007.14 | 107977088 | rs1440535939 | C                                              | T                                                                                                                                                                                                                                         | RS=rs1440535939;Source=dbsnp |
| NC_000007.14 | 107977090 | rs2033881756 | TCCTTTCTC                                      | TCCTTTCTCTCCTTTCTC                                                                                                                                                                                                                        | RS=rs2033881756;Source=dbsnp |
| NC_000007.14 | 107977090 | rs1410357209 | T                                              | C                                                                                                                                                                                                                                         | RS=rs1410357209;Source=dbsnp |
| NC_000007.14 | 107977091 | rs2033881807 | C                                              | G                                                                                                                                                                                                                                         | RS=rs2033881807;Source=dbsnp |
| NC_000007.14 | 107977092 | rs1355662380 | C                                              | T                                                                                                                                                                                                                                         | RS=rs1355662380;Source=dbsnp |
| NC_000007.14 | 107977094 | rs1175591288 | TTCCTC                                         | TTCTTCCTC                                                                                                                                                                                                                                 | RS=rs1175591288;Source=dbsnp |
| NC_000007.14 | 107977098 | rs2033881970 | T                                              | C                                                                                                                                                                                                                                         | RS=rs2033881970;Source=dbsnp |
| NC_000007.14 | 107977099 | rs2033882148 | CCCCTTCCTTC                                    | C                                                                                                                                                                                                                                         | RS=rs2033882148;Source=dbsnp |
| NC_000007.14 | 107977099 | rs2033882093 | CCCCTTC                                        | C                                                                                                                                                                                                                                         | RS=rs2033882093;Source=dbsnp |
| NC_000007.14 | 107977099 | rs1469651144 | CCCC                                           | CCCC                                                                                                                                                                                                                                      | RS=rs1469651144;Source=dbsnp |
| NC_000007.14 | 107977099 | rs1208142391 | C                                              | CT                                                                                                                                                                                                                                        | RS=rs1208142391;Source=dbsnp |
| NC_000007.14 | 107977100 | rs2033882301 | CCCCT                                          | C                                                                                                                                                                                                                                         | RS=rs2033882301;Source=dbsnp |
| NC_000007.14 | 107977100 | rs1264479520 | C                                              | T                                                                                                                                                                                                                                         | RS=rs1264479520;Source=dbsnp |
| NC_000007.14 | 107977101 | rs1584524277 | CCT                                            | CCTCCT,CCTCCTTCCT                                                                                                                                                                                                                         | RS=rs1584524277;Source=dbsnp |
| NC_000007.14 | 107977103 | rs2033882477 | T                                              | TCC,TCCTTCCTTCCTTTCTC                                                                                                                                                                                                                     | RS=rs2033882477;Source=dbsnp |

|              |           |                              |                        |                              |
|--------------|-----------|------------------------------|------------------------|------------------------------|
| NC_000007.14 | 107977103 | rs2033882425 T               | C                      | RS=rs2033882425;Source=dbsnp |
| NC_000007.14 | 107977104 | rs2033882592 TCCCTTCCTCCCT   | TCCCTTCCTCCCTTCCCTCCCT | RS=rs2033882592;Source=dbsnp |
| NC_000007.14 | 107977104 | rs1448138936 TTC             | T                      | RS=rs1448138936;Source=dbsnp |
| NC_000007.14 | 107977105 | rs1188303935 CCC             | CC                     | RS=rs1188303935;Source=dbsnp |
| NC_000007.14 | 107977106 | rs1584524300 C               | CTTCCTTTCCCT           | RS=rs1584524300;Source=dbsnp |
| NC_000007.14 | 107977107 | rs1246615965 C               | A,T                    | RS=rs1246615965;Source=dbsnp |
| NC_000007.14 | 107977108 | rs2033882799 T               | G                      | RS=rs2033882799;Source=dbsnp |
| NC_000007.14 | 107977110 | rs2033882945 CCTCCCTCCCTCCCT | CCTCCCTCCCT            | RS=rs2033882945;Source=dbsnp |
| NC_000007.14 | 107977110 | rs1489981560 CC              | C                      | RS=rs1489981560;Source=dbsnp |
| NC_000007.14 | 107977110 | rs1016395824 C               | T                      | RS=rs1016395824;Source=dbsnp |
| NC_000007.14 | 107977112 | rs1446855936 T               | TT                     | RS=rs1446855936;Source=dbsnp |
| NC_000007.14 | 107977113 | rs1165035701 TCCCTCCC        | T                      | RS=rs1165035701;Source=dbsnp |
| NC_000007.14 | 107977113 | rs1368689933 C               | T                      | RS=rs1368689933;Source=dbsnp |
| NC_000007.14 | 107977115 | rs2033883157 C               | T                      | RS=rs2033883157;Source=dbsnp |
| NC_000007.14 | 107977117 | rs2033883256 C               | T                      | RS=rs2033883256;Source=dbsnp |
| NC_000007.14 | 107977122 | rs1318357670 CCTTCCTTC       | CCTTC                  | RS=rs1318357670;Source=dbsnp |
| NC_000007.14 | 107977122 | rs896683381 C                | T                      | RS=rs896683381;Source=dbsnp  |
| NC_000007.14 | 107977125 | rs114031086 T                | C                      | RS=rs114031086;Source=dbsnp  |
| NC_000007.14 | 107977126 | rs113393176 C                | T                      | RS=rs113393176;Source=dbsnp  |
| NC_000007.14 | 107977146 | rs2033883556 C               | T                      | RS=rs2033883556;Source=dbsnp |
| NC_000007.14 | 107977148 | rs1276582227 T               | C                      | RS=rs1276582227;Source=dbsnp |
| NC_000007.14 | 107977149 | rs1563000370 C               | T                      | RS=rs1563000370;Source=dbsnp |
